# Supplementary material for: RMI2 Depletion Recovers cGAS-STING Signaling to Enhance Immunotherapy in Colorectal Cancer
Source: Research Square preprint supplement (doi:10.21203/rs.3.rs-8706982/v1), 2026-02-19
Supplement: Supplementary file 2 [file 2aad5a44757a01b659d25d90.xlsx]

## Sheet: Supplementary Table 
Gene	log2FC_sgRMI2/NC	logCPM	PValue	FDR	sig
SPARC	7.24107	6.41934	8.29745e-11	1.20935e-06	Up
CRISPLD2	6.16525	2.74812	3.39468e-07	0.00244369	Up
C7orf55-LUC7L2	-9.50432	1.6579	5.02989e-07	0.00244369	Dn
GREM1	9.30896	1.38175	1.1295e-06	0.00411562	Up
LAMC2	4.65415	7.61036	1.60716e-06	0.00468489	Up
COL1A1	4.47708	7.21348	3.26525e-06	0.00793184	Up
AP003419.1	-8.92753	1.1202	4.40838e-06	0.00917888	Dn
AMIGO3	8.86048	0.948354	6.37378e-06	0.0107073	Up
LTB	4.52739	3.68118	6.61173e-06	0.0107073	Up
IL32	4.22433	6.24507	9.6226e-06	0.013837	Up
AC120057.2	8.71496	0.809408	1.04431e-05	0.013837	Up
HR	-4.10656	6.06198	1.54619e-05	0.0187797	Dn
COL5A1	4.02102	7.51025	1.92223e-05	0.0204273	Up
AC009086.2	4.56473	2.16119	2.08212e-05	0.0204273	Up
C9orf152	-5.70078	1.21858	2.11108e-05	0.0204273	Dn
SERPINA5	8.51843	0.623359	2.24245e-05	0.0204273	Up
SUSD5	4.29763	2.62641	3.38942e-05	0.025221	Up
ADRB1	4.30737	2.48682	3.53663e-05	0.025221	Up
AC068631.2	8.37075	0.484931	3.6339e-05	0.025221	Up
LINC00261	8.37075	0.484931	3.6339e-05	0.025221	Up
AL807752.3	-8.35474	0.598844	3.6339e-05	0.025221	Dn
EXPH5	4.0865	3.00303	3.96397e-05	0.0262613	Up
LNCAROD	4.87964	1.50672	5.14756e-05	0.0326199	Up
HABP2	3.94954	3.42119	5.82546e-05	0.0353775	Up
KRT20	4.07555	2.7893	6.31245e-05	0.0353779	Up
SPDEF	-3.81202	4.05255	6.59738e-05	0.0353779	Dn
CDCP1	3.72175	5.98714	6.60617e-05	0.0353779	Up
PACSIN1	-4.79553	1.25768	6.91507e-05	0.0353779	Dn
CHURC1-FNTB	-8.18537	0.447621	7.03917e-05	0.0353779	Dn
LINC01433	-4.7754	1.23956	7.49901e-05	0.0360989	Dn
COL13A1	4.27913	1.64044	7.67798e-05	0.0360989	Up
PCDHB8	4.15104	1.98762	8.32268e-05	0.0375156	Up
OXTR	3.7868	3.45236	8.49409e-05	0.0375156	Up
CALHM5	5.01252	1.09369	8.84734e-05	0.0379265	Up
AC025283.2	8.11634	0.249605	9.36436e-05	0.0389959	Up
SEMA7A	3.96926	2.3189	0.000113758	0.0460563	Up
ANPEP	3.56829	4.43294	0.000139013	0.0547597	Up
LY6K	3.88943	2.09686	0.000166697	0.0625821	Up
H19	-3.48048	5.66677	0.00016823	0.0625821	Dn
SPOCK3	7.9178	0.0691202	0.000172911	0.0625821	Up
NIPAL4	3.54556	3.75204	0.000176046	0.0625821	Up
BCL2A1	3.87539	1.91905	0.000201477	0.0699172	Up
SERPINA10	5.32593	0.517129	0.000210393	0.0701688	Up
GNG2	4.7603	0.86019	0.000217408	0.0701688	Up
PLEK2	3.73369	2.47179	0.000222553	0.0701688	Up
ROS1	3.61785	2.56831	0.000225101	0.0701688	Up
KRT4	-4.04997	1.78511	0.000228465	0.0701688	Dn
ADAM19	3.39621	5.27283	0.000235441	0.0701688	Up
AC010616.2	-7.81907	0.126066	0.000240716	0.0701688	Dn
AL139099.4	-7.81907	0.126066	0.000240716	0.0701688	Dn
ADGRF4	3.45702	3.40976	0.000282903	0.0801024	Up
AC092143.1	-7.77198	0.0853236	0.000285964	0.0801024	Dn
PLA2G4C	3.51029	3.01501	0.000295978	0.0801024	Up
CX3CL1	3.53507	2.58433	0.000298146	0.0801024	Up
AMPD3	3.6501	2.39511	0.000302273	0.0801024	Up
ITGAX	3.52259	2.38373	0.000324222	0.0843846	Up
IFI16	3.76879	1.63595	0.000339277	0.0857872	Up
AC007192.1	7.74862	-0.0822045	0.000341383	0.0857872	Up
PEAR1	3.38214	3.08096	0.000371311	0.0904665	Up
B3GALT5	3.45134	2.82546	0.000376409	0.0904665	Up
MEG3	3.28865	4.12635	0.000385267	0.0904665	Up
STYK1	4.32426	0.991417	0.000390437	0.0904665	Up
DUOX2	5.1614	0.368086	0.000396951	0.0904665	Up
ALOXE3	3.6475	1.87554	0.000398766	0.0904665	Up
AL035078.4	7.68751	-0.136259	0.00040966	0.0904665	Up
AL121722.1	-7.62071	-0.0445353	0.00040966	0.0904665	Dn
ASB2	5.11715	0.32837	0.000454346	0.0987658	Up
SERF1A	-3.75005	1.76206	0.000460794	0.0987658	Dn
COL6A3	3.77301	1.17835	0.000478283	0.100529	Up
ABLIM3	3.30429	3.3181	0.000488359	0.100529	Up
CDH16	3.37696	2.75808	0.000490791	0.100529	Up
IL11	3.22944	3.87739	0.000507326	0.100529	Up
NEURL3	3.8379	0.93602	0.000512118	0.100529	Up
BIK	3.58415	1.81822	0.000512545	0.100529	Up
SCG5	3.63514	1.51522	0.000517304	0.100529	Up
AL139011.2	3.36652	2.59883	0.000524706	0.100626	Up
RAB3B	3.13843	6.21089	0.000544356	0.103039	Up
MAGEB6	4.49182	0.616351	0.000554409	0.103596	Up
ATG9B	7.55693	-0.250616	0.00059992	0.106759	Up
Z98883.1	7.55693	-0.250616	0.00059992	0.106759	Up
AP001781.2	-7.51026	-0.138321	0.00059992	0.106759	Dn
HECW2-AS1	5.02438	0.245611	0.000600631	0.106759	Up
TNFRSF9	3.30704	2.76451	0.000620341	0.10772	Up
PCDHB16	4.45446	0.582849	0.000620821	0.10772	Up
BEAN1	3.22182	2.8783	0.000651306	0.11168	Up
FAM83A	-3.32413	2.63756	0.00067859	0.11391	Dn
SELL	3.74501	0.85381	0.000679941	0.11391	Up
CREB5	3.40441	2.17229	0.000712259	0.117968	Up
SCN4A	7.48693	-0.311253	0.000732646	0.119981	Up
TMEM130	3.71267	0.825362	0.000749483	0.121375	Up
RMI2	-2.52164	4.82304	0.000770043	0.122455	Dn
NECTIN4	3.48545	1.56586	0.000773287	0.122768	Up
SP140L	3.17375	2.83536	0.000776982	0.122768	Up
MMP9	4.37669	0.513491	0.000783358	0.122768	Up
FRMD5	3.12416	3.33019	0.00079237	0.122859	Up
NTSR1	4.92523	0.157986	0.000804374	0.123408	Up
OTUB2	3.04544	4.49976	0.000871841	0.131275	Up
FCGBP	-2.98543	7.14347	0.000896785	0.131275	Dn
HPN	7.41335	-0.374454	0.000900684	0.131275	Up
SERPINA4	7.41335	-0.374454	0.000900684	0.131275	Up
TLR9	7.41335	-0.374454	0.000900684	0.131275	Up
GPSM3	3.58437	1.01092	0.000927373	0.132541	Up
RASSF10	3.01065	4.70788	0.00092756	0.132541	Up
NPY4R2	-3.10414	3.21208	0.000980796	0.138787	Dn
ADGRE1	3.1005	3.22492	0.000994966	0.139439	Up
NPY4R	-3.0323	4.0449	0.00102631	0.142384	Dn
COL21A1	3.37549	1.63146	0.00103552	0.142384	Up
MXD1	3.04071	3.25605	0.00106765	0.145117	Up
SLC2A14	3.33376	1.74114	0.00107686	0.145117	Up
ITIH5	3.46502	1.15275	0.00108735	0.145117	Up
AC011330.1	-7.32692	-0.291953	0.00111513	0.145117	Dn
GDF1	-7.32692	-0.291953	0.00111513	0.145117	Dn
SENP3-EIF4A1	-7.32692	-0.291953	0.00111513	0.145117	Dn
KSR2	3.01982	3.39248	0.00115214	0.147765	Up
EPCAM	2.98114	3.97624	0.00115576	0.147765	Up
AC113189.4	3.36365	1.45783	0.0011935	0.151263	Up
NMNAT2	3.0003	3.17886	0.00121203	0.152287	Up
NECAB2	-3.21074	1.98041	0.00125503	0.156343	Dn
ZNF365	4.25157	0.402987	0.00128179	0.157644	Up
ESAM	2.98519	3.28651	0.00128711	0.157644	Up
CPA4	3.09609	2.35763	0.00134616	0.16321	Up
ELMOD1	3.93821	0.645651	0.00139033	0.16321	Up
AC138866.1	-7.26023	-0.347157	0.00139115	0.16321	Dn
AC116351.1	7.25388	-0.509481	0.00139115	0.16321	Up
PRICKLE2-AS1	7.25388	-0.509481	0.00139115	0.16321	Up
PLAT	3.00089	2.68234	0.00139974	0.16321	Up
AL358113.1	4.20732	0.364252	0.00145876	0.167413	Up
SLC2A3P1	4.20732	0.364252	0.00145876	0.167413	Up
CNGB1	4.76242	0.0160739	0.00150764	0.168826	Up
GJB5	4.76242	0.0160739	0.00150764	0.168826	Up
SLC5A5	4.76242	0.0160739	0.00150764	0.168826	Up
PLAU	2.8222	8.47741	0.00153495	0.168826	Up
XDH	3.05575	2.15564	0.00154045	0.168826	Up
MIR3142HG	3.50175	0.642188	0.00155059	0.168826	Up
IGDCC4	2.89301	3.82496	0.00155215	0.168826	Up
VANGL2	2.92355	3.23231	0.00158407	0.171021	Up
APOE	2.86339	4.30389	0.00162598	0.174254	Up
SCN2A	4.16168	0.324484	0.00166464	0.176205	Up
LSAMP	3.20683	1.62921	0.00166836	0.176205	Up
BAAT	2.94471	2.63311	0.00170838	0.179134	Up
AC013489.3	-7.19031	-0.404629	0.0017497	0.181797	Dn
THRA	-2.79683	5.98694	0.00176976	0.181797	Dn
GRAMD2B	3.21747	1.49232	0.0017712	0.181797	Up
SAMD11	-2.79344	5.96425	0.00180327	0.183795	Dn
AL360270.1	4.11455	0.283626	0.0019049	0.189749	Up
KLRC2	3.24726	1.17278	0.00191742	0.189749	Up
UGT2B15	3.24726	1.17278	0.00191742	0.189749	Up
DISC1	2.90601	2.59935	0.00191985	0.189749	Up
UNC5B	-3.52759	0.664961	0.0019398	0.189749	Dn
JPH2	3.42398	0.57575	0.0019398	0.189749	Up
CCDC198	2.89476	2.7572	0.00198637	0.193009	Up
GBP3	2.9603	2.31515	0.00205438	0.198295	Up
NKX3-1	2.87683	2.68784	0.0021151	0.201628	Up
CFP	-4.31047	0.00423332	0.00211658	0.201628	Dn
PTHLH	2.80845	3.41208	0.00213701	0.202253	Up
FHDC1	2.82252	3.06468	0.00220789	0.206097	Up
AC005540.1	-7.11683	-0.464564	0.00222005	0.206097	Dn
LAMA5-AS1	-7.11683	-0.464564	0.00222005	0.206097	Dn
DEGS2	-3.37304	1.19175	0.00223876	0.206519	Dn
CLDN4	2.75389	4.09778	0.00228256	0.209234	Up
RRAD	3.29878	0.763474	0.00236997	0.21589	Up
DKK3	2.70599	5.65041	0.00244798	0.22161	Up
PRODH2	2.91513	2.11872	0.00247209	0.222412	Up
SLCO2B1	2.70472	5.34672	0.00248885	0.222546	Up
DPEP1	-3.71615	0.321177	0.00251672	0.223666	Dn
SERPINF1	3.0276	1.83907	0.00255312	0.225526	Up
C10orf91	-2.82618	2.67224	0.00257409	0.226008	Dn
HPD	-2.72812	4.11459	0.00261153	0.22766	Dn
IFNE	3.26325	0.733252	0.00262415	0.22766	Up
MAPK4	-2.79273	3.1889	0.00274922	0.23416	Dn
GP1BB	-3.42604	0.580099	0.00275653	0.23416	Dn
SLC26A9	2.7602	3.20164	0.00276366	0.23416	Up
NAV2	2.67603	4.69437	0.00282975	0.23416	Up
DENND2A	7.07457	-0.657917	0.00284366	0.23416	Up
GJB4	7.07457	-0.657917	0.00284366	0.23416	Up
LINC02202	7.07457	-0.657917	0.00284366	0.23416	Up
RGS22	7.07457	-0.657917	0.00284366	0.23416	Up
GPR75-ASB3	-7.03941	-0.527183	0.00284366	0.23416	Dn
HMGA2	2.64429	6.53795	0.00287763	0.23534	Up
CLTRN	3.96314	0.153879	0.00290643	0.23534	Up
TMEM225B	-3.67326	0.285693	0.00290643	0.23534	Dn
RND1	2.64744	5.29727	0.00300702	0.238348	Up
PLA2G4B	-3.42022	0.941412	0.00301445	0.238348	Dn
AL390726.6	4.51211	-0.196902	0.00302917	0.238348	Up
GPR87	4.51211	-0.196902	0.00302917	0.238348	Up
AL139353.1	-4.20002	-0.086398	0.00302917	0.238348	Dn
SLIT1	-2.97544	1.6362	0.00305549	0.238348	Dn
DNAH5	2.72174	2.93623	0.00305805	0.238348	Up
SYT13	2.83033	2.04566	0.00316839	0.245635	Up
SOWAHB	3.08097	1.03011	0.00335507	0.254319	Up
TMEM59L	2.67469	3.41853	0.00336728	0.254319	Up
CGB8	3.90893	0.107999	0.00336765	0.254319	Up
FIRRE	3.90893	0.107999	0.00336765	0.254319	Up
TRPC6	3.90893	0.107999	0.00336765	0.254319	Up
ICAM1	2.60878	4.86016	0.00345822	0.259812	Up
HAS3	2.58531	6.15397	0.00353005	0.261408	Up
NOVA2	2.7258	2.7612	0.00353064	0.261408	Up
ATOH8	-2.68051	3.48718	0.00353327	0.261408	Dn
RHCG	2.67694	3.01855	0.00358594	0.262995	Up
LIN28B	2.60726	4.68284	0.00359081	0.262995	Up
CYP4F29P	6.9758	-0.738048	0.00368003	0.264219	Up
FOLR1	6.9758	-0.738048	0.00368003	0.264219	Up
KLRC3	6.9758	-0.738048	0.00368003	0.264219	Up
ZNF648	6.9758	-0.738048	0.00368003	0.264219	Up
SLC24A4	3.60807	0.360418	0.00399788	0.284259	Up
MMP10	3.07688	0.818905	0.00399816	0.284259	Up
SYTL5	2.88906	1.60796	0.00405867	0.287161	Up
KRT6A	4.36852	-0.315957	0.00442948	0.310383	Up
TMEM179	4.36852	-0.315957	0.00442948	0.310383	Up
RTN4RL2	-2.5008	8.22417	0.00447441	0.310645	Dn
CYP4F11	-2.51131	6.11335	0.00447584	0.310645	Dn
SPTBN5	3.56094	0.320598	0.00454775	0.312658	Up
PCDHGA4	3.16184	0.356584	0.00454775	0.312658	Up
EBI3	2.50746	5.22382	0.00466678	0.319335	Up
SYT3	2.69258	2.22635	0.00476779	0.324722	Up
SAMD9L	2.8909	1.21197	0.0048544	0.327995	Up
EDAR	-3.28042	0.823792	0.00486085	0.327995	Dn
GLIPR2	2.59015	3.19223	0.0048838	0.328025	Up
FAM198B-AS1	2.92607	0.899752	0.00516595	0.339503	Up
RDH12	3.51222	0.279687	0.00518687	0.339503	Up
TRO	3.51222	0.279687	0.00518687	0.339503	Up
2025-09-04	3.11312	0.316712	0.00518687	0.339503	Up
AC005336.1	-2.68171	2.17341	0.00523547	0.339503	Dn
RUNX2	2.6886	1.6532	0.0052487	0.339503	Up
MUC5B	-2.44851	9.0366	0.00527247	0.339503	Dn
RINL	2.56043	3.10049	0.00528425	0.339503	Up
SUSD2	-2.45476	6.76668	0.00530193	0.339503	Dn
SERPINA1	2.67689	1.91519	0.00536572	0.339503	Up
PCDHB13	2.97026	0.729909	0.00537177	0.339503	Up
DDIT4L	-2.75821	1.59629	0.0054027	0.339503	Dn
CPAMD8	4.29099	-0.379234	0.0054041	0.339503	Up
NPC1L1	4.29099	-0.379234	0.0054041	0.339503	Up
AC087623.1	-4.01668	-0.234417	0.0054041	0.339503	Dn
SPC24	-2.51034	3.62402	0.00568956	0.355903	Dn
BIVM-ERCC5	2.64285	1.96689	0.00571843	0.35618	Up
IL6R	2.43063	5.82174	0.00580186	0.359839	Up
AC010422.6	3.46179	0.237624	0.00593201	0.364806	Up
FOXJ1	3.46179	0.237624	0.00593201	0.364806	Up
CYP4F12	-3.05188	0.92165	0.00619107	0.379138	Dn
FOSL1	2.4055	6.11743	0.00625559	0.381486	Up
SEMA3D	-3.43729	0.0933718	0.00629519	0.382174	Dn
COL20A1	2.98657	0.50257	0.0063193	0.382174	Up
AL158206.1	2.49744	2.90443	0.00636743	0.382867	Up
SYT11	-2.92624	1.0556	0.00638331	0.382867	Dn
TMC7	2.42999	4.13035	0.00661255	0.391553	Up
BEST3	4.20905	-0.445302	0.00663559	0.391553	Up
GPR143	4.20905	-0.445302	0.00663559	0.391553	Up
TMEM163	4.20905	-0.445302	0.00663559	0.391553	Up
DCDC1	2.76702	1.25274	0.00666332	0.391605	Up
CPN1	3.01043	0.233631	0.00680349	0.396644	Up
SPDYE2B	3.01043	0.233631	0.00680349	0.396644	Up
ZC3H6	-2.63921	1.62666	0.00693111	0.402474	Dn
KCNF1	2.38649	4.91867	0.00706013	0.408339	Up
ECM1	2.49863	2.36551	0.00710745	0.408691	Up
IRAK2	2.36901	5.70138	0.00714828	0.408691	Up
HNRNPA1P33	-2.75052	1.2909	0.00715034	0.408691	Dn
AL590004.3	2.69954	1.44804	0.00728676	0.413519	Up
KLHL4	2.39714	3.81289	0.00729156	0.413519	Up
GLIPR1	2.40407	3.96239	0.00734405	0.414882	Up
ZSWIM8-AS1	-3.33092	0.00836614	0.00743482	0.418388	Dn
LGALS3BP	2.33197	7.96571	0.00764212	0.426301	Up
CGB7	2.70644	1.33351	0.00771852	0.426301	Up
SLC37A1	2.39771	3.42572	0.00773784	0.426301	Up
HLA-B	2.35135	4.94073	0.00775276	0.426301	Up
NCF2	2.55054	1.63455	0.00779145	0.426301	Up
KMO	3.35532	0.149772	0.00782613	0.426301	Up
TPTEP2-CSNK1E	3.35532	0.149772	0.00782613	0.426301	Up
MYH15	2.95622	0.190294	0.00782613	0.426301	Up
C3orf52	2.36077	4.46268	0.00784768	0.426301	Up
DRD1	2.43828	3.03141	0.00786791	0.426301	Up
IMPA2	-2.33251	5.73988	0.00798915	0.431266	Dn
PAQR9	2.42882	2.95549	0.00804467	0.432661	Up
SLC22A11	2.81462	0.602325	0.00814195	0.434786	Up
CREB3L1	4.12218	-0.51442	0.00820351	0.434786	Up
ZSCAN18	4.12218	-0.51442	0.00820351	0.434786	Up
KCNJ2-AS1	-3.88007	-0.342595	0.00820351	0.434786	Dn
RNF182	2.73691	0.923663	0.00823383	0.434812	Up
FAM198B	2.32312	5.21991	0.00832748	0.436738	Up
QPCT	2.31057	6.13831	0.00834966	0.436738	Up
EFR3B	2.32686	5.01798	0.00836021	0.436738	Up
COL17A1	2.3781	3.55047	0.00845941	0.440343	Up
SMIM11B	-2.54063	1.96775	0.00855641	0.443807	Dn
SESN2	2.29685	5.80708	0.00880698	0.452618	Up
AGT	3.60228	-0.145234	0.00881945	0.452618	Up
IL31RA	3.60228	-0.145234	0.00881945	0.452618	Up
FAM43A	2.4236	2.45806	0.00889114	0.454696	Up
ZNF311	2.89988	0.145667	0.00903024	0.460195	Up
CD163L1	2.84956	0.391635	0.0090842	0.461332	Up
DSC2	2.29263	5.20818	0.00917867	0.464511	Up
MCC	2.37163	2.90799	0.00941509	0.47479	Up
PGM2L1	2.27894	5.62642	0.00944694	0.47479	Up
SOX2	2.28682	4.57855	0.00958208	0.479927	Up
PKD1L2	2.30115	3.71415	0.00966283	0.482314	Up
UGT1A7	-2.2659	5.98157	0.00970113	0.482573	Dn
LINC02593	-2.31608	3.89873	0.00976786	0.483788	Dn
UCN2	2.35921	2.78935	0.00979194	0.483788	Up
ACER2	2.31399	3.38077	0.0100205	0.490589	Up
AKR1C2	-2.23862	10.4765	0.0101256	0.490589	Dn
CHGB	2.26041	5.26048	0.0101329	0.490589	Up
CYP3A5	2.32853	3.26599	0.0102128	0.490589	Up
AC022826.2	-3.80659	-0.399997	0.010216	0.490589	Dn
AC025181.2	-3.80659	-0.399997	0.010216	0.490589	Dn
AC055811.1	-3.80659	-0.399997	0.010216	0.490589	Dn
EPHA7	-3.80659	-0.399997	0.010216	0.490589	Dn
CCDC153	2.80084	0.352749	0.0102998	0.490589	Up
F10	2.80084	0.352749	0.0102998	0.490589	Up
SBSN	2.80084	0.352749	0.0102998	0.490589	Up
IFI44	3.53227	-0.201457	0.0105104	0.498988	Up
HDAC9	2.5824	1.3511	0.0106335	0.50319	Up
TTLL6	2.27958	3.51306	0.0107003	0.50392	Up
PARP10	2.43434	1.86971	0.010718	0.50392	Up
ARSJ	2.30902	3.22314	0.0108422	0.50812	Up
TRPA1	2.35775	2.58728	0.0109338	0.510771	Up
ZNF713	2.60386	1.1182	0.0111014	0.516941	Up
COL15A1	2.60204	0.973279	0.011397	0.529018	Up
ADH1C	-2.49869	1.73813	0.0116546	0.536175	Dn
CHST2	2.41098	1.69485	0.0116546	0.536175	Up
AFAP1L2	2.23596	3.84015	0.0116616	0.536175	Up
AJ009632.2	2.75041	0.312826	0.0117068	0.536561	Up
SERPINA6	2.39035	1.97435	0.0118326	0.540628	Up
ZNF185	2.20909	4.76294	0.0121075	0.549535	Up
NPY2R	2.53274	1.31048	0.012121	0.549535	Up
LCP1	2.84125	0.0996689	0.0121407	0.549535	Up
UNC5CL	2.31765	2.37094	0.0122065	0.549542	Up
STX3	2.19199	5.47749	0.0122162	0.549542	Up
PFDN1	-2.20208	4.9439	0.0123526	0.553966	Dn
CD79A	3.45869	-0.259873	0.0125866	0.56273	Up
C1orf220	4.02974	-0.58688	0.0128214	0.564796	Up
C6orf58	4.02974	-0.58688	0.0128214	0.564796	Up
LINC01426	4.02974	-0.58688	0.0128214	0.564796	Up
RNASE1	4.02974	-0.58688	0.0128214	0.564796	Up
ILF3-DT	-2.34474	2.33537	0.0128266	0.564796	Dn
GRHL3	2.36405	1.81236	0.0129072	0.566634	Up
ANKRD2	-2.31568	2.18001	0.0131009	0.57341	Dn
DNAH10	2.29239	2.19578	0.0133228	0.57693	Up
PCDHB11	2.69815	0.271809	0.0133396	0.57693	Up
PKIB	2.69815	0.271809	0.0133396	0.57693	Up
PTCHD4	2.69815	0.271809	0.0133396	0.57693	Up
PTPN18	-2.16666	4.79646	0.0135348	0.583637	Dn
AL356056.2	-2.37253	1.52784	0.0137301	0.590314	Dn
C12orf75	2.14426	6.11516	0.0138539	0.593883	Up
PLXNA4	3.17925	0.00749711	0.0141499	0.596329	Up
Z83844.3	-2.87808	0.137985	0.0141499	0.596329	Dn
CAPN8	2.78015	0.0522151	0.0141499	0.596329	Up
LINC00862	2.78015	0.0522151	0.0141499	0.596329	Up
AL596244.1	2.64012	0.462811	0.0142523	0.596329	Up
NFE2	2.64012	0.462811	0.0142523	0.596329	Up
TRPV2	2.64012	0.462811	0.0142523	0.596329	Up
LINC01447	2.26993	2.42665	0.0142611	0.596329	Up
AL645608.2	-2.31886	2.03743	0.0142792	0.596329	Dn
AL121594.1	2.26567	2.22749	0.0145291	0.604741	Up
PPARGC1A	-2.19453	3.57361	0.0145636	0.604741	Dn
SPOCK1	2.25934	2.46311	0.0148637	0.615448	Up
PCSK9	-2.19343	3.18224	0.0149918	0.617468	Dn
ITGA5	2.10899	7.75119	0.0150444	0.617468	Up
QPRT	2.11533	5.78241	0.0151192	0.617468	Up
EMBP1	3.38116	-0.320657	0.0151503	0.617468	Up
TRIM54	3.38116	-0.320657	0.0151503	0.617468	Up
PCDHB6	2.44357	1.34854	0.0151666	0.617468	Up
C15orf48	2.11661	5.41076	0.0152611	0.619582	Up
SULT1C2	2.308	1.90741	0.015333	0.620773	Up
F5	2.10422	6.57947	0.0153994	0.621735	Up
PCDHGA1	2.52599	0.753556	0.0155408	0.625711	Up
AOX1	2.23332	2.09269	0.0158816	0.63232	Up
GGT5	-2.12004	4.19983	0.0160074	0.63232	Dn
FGFBP1	-2.54758	0.950287	0.0160102	0.63232	Dn
TUBA1A	2.08543	7.4011	0.0161585	0.63232	Up
OLFML2B	2.41853	1.32834	0.0161727	0.63232	Up
AC024560.1	3.93097	-0.663023	0.0162256	0.63232	Up
AL512306.2	3.93097	-0.663023	0.0162256	0.63232	Up
C7orf69	3.93097	-0.663023	0.0162256	0.63232	Up
FOXC2	3.93097	-0.663023	0.0162256	0.63232	Up
LGI2	3.93097	-0.663023	0.0162256	0.63232	Up
LINC00460	3.93097	-0.663023	0.0162256	0.63232	Up
RPRML	3.93097	-0.663023	0.0162256	0.63232	Up
DNAH17	2.21481	2.0203	0.0163648	0.636044	Up
LZTS3	2.09315	5.01073	0.0165406	0.636524	Up
SLCO5A1	3.11543	-0.043098	0.0165518	0.636524	Up
AL590560.1	-2.77171	0.055595	0.0165518	0.636524	Dn
DQX1	2.71633	0.00321089	0.0165518	0.636524	Up
SELENOP	2.43907	1.11535	0.0167306	0.641707	Up
CRYBG2	2.1439	3.26599	0.0167962	0.642531	Up
HBEGF	2.15137	3.01137	0.0168713	0.643713	Up
DUSP8	2.12163	3.678	0.0169621	0.644065	Up
APOL1	2.1063	4.11798	0.0169688	0.644065	Up
AC012146.1	-2.58613	0.780173	0.017105	0.647545	Dn
TMPPE	2.20675	2.12671	0.0173006	0.653256	Up
HS6ST2	2.5876	0.186246	0.017459	0.657534	Up
SYTL2	2.07684	4.88234	0.0175169	0.658012	Up
AL138756.1	2.19002	2.26764	0.0176165	0.660054	Up
PDZK1	-2.44003	1.04031	0.0177819	0.663804	Dn
NT5E	2.05717	5.99748	0.0178312	0.663804	Up
JCAD	2.08329	4.48355	0.0178532	0.663804	Up
ADAM28	2.54427	0.387851	0.01808	0.668823	Up
CALY	2.54427	0.387851	0.01808	0.668823	Up
NTN1	2.10941	3.49929	0.0181277	0.668888	Up
KRT86	2.08354	3.94974	0.0183323	0.674685	Up
AC130304.1	2.3671	1.2871	0.0184237	0.674685	Up
STK33	2.3671	1.2871	0.0184237	0.674685	Up
SYNGR4	2.24619	1.56232	0.0188289	0.687796	Up
PCDHB10	3.04867	-0.0954605	0.019435	0.706395	Up
CYP2E1	2.64957	-0.0474476	0.019435	0.706395	Up
CYP4F3	-2.03527	5.43086	0.019549	0.708115	Dn
SLC44A5	2.37261	1.18147	0.0195794	0.708115	Up
SVEP1	-2.09421	2.89646	0.0199138	0.718151	Dn
RAET1G	-2.27736	1.66072	0.0199555	0.718151	Dn
ABCA12	2.04096	4.54547	0.0200417	0.719479	Up
CYGB	2.10734	2.46813	0.0202953	0.724484	Up
MRPL18	-2.02624	4.92006	0.0203728	0.724484	Dn
PAG1	2.49384	0.348915	0.0204297	0.724484	Up
PON1	2.49384	0.348915	0.0204297	0.724484	Up
ZRSR2P1	2.49384	0.348915	0.0204297	0.724484	Up
CYB5A	-2.01505	5.54421	0.0204945	0.725018	Dn
LINC01963	-2.03451	4.11601	0.0206666	0.729337	Dn
RAC2	2.40771	0.66063	0.0208084	0.73221	Up
SPON2	2.39615	0.809209	0.0209035	0.73221	Up
ZNF843	2.39615	0.809209	0.0209035	0.73221	Up
DCLK1	2.3868	0.944097	0.0209649	0.73221	Up
SLC16A10	2.20187	1.52725	0.0210473	0.73221	Up
ZNF117	2.21947	1.45696	0.0210495	0.73221	Up
SLC16A2	2.00023	5.84158	0.0212904	0.738169	Up
SEMA3A	1.99951	5.46779	0.0213649	0.738169	Up
TSPAN10	2.09747	2.75301	0.0213727	0.738169	Up
F2RL2	2.0041	4.58841	0.0219468	0.756205	Up
PRICKLE2	1.98333	6.09087	0.0221145	0.759503	Up
SLAMF7	3.21235	-0.450156	0.0223148	0.759503	Up
LINGO1	-2.06619	2.8368	0.0223616	0.759503	Dn
NDUFC2-KCTD14	-2.21456	1.40278	0.0224232	0.759503	Dn
WDR66	2.35294	0.917476	0.0227986	0.759503	Up
LHX6	2.35878	0.780019	0.0229013	0.759503	Up
RASD1	2.35878	0.780019	0.0229013	0.759503	Up
KCNT2	2.97866	-0.149717	0.0229108	0.759503	Up
MYO15A	2.97866	-0.149717	0.0229108	0.759503	Up
SPDYE10P	-2.65687	-0.0319678	0.0229108	0.759503	Dn
AC104407.1	2.57956	-0.0998752	0.0229108	0.759503	Up
AC134043.2	2.57956	-0.0998752	0.0229108	0.759503	Up
AL360270.2	2.57956	-0.0998752	0.0229108	0.759503	Up
DHDH	2.57956	-0.0998752	0.0229108	0.759503	Up
SYT5	2.57956	-0.0998752	0.0229108	0.759503	Up
ASNS	-1.96907	6.29169	0.0229431	0.759503	Dn
C4BPA	2.01526	3.27762	0.0229938	0.759503	Up
PLCH2	2.36602	0.628325	0.0230006	0.759503	Up
WNT5A	-2.60077	0.557521	0.023086	0.759503	Dn
CCDC169	2.52897	0.141562	0.0231099	0.759503	Up
AC211433.1	-2.71207	0.363163	0.0231368	0.759503	Dn
CMC4	-2.08139	2.64558	0.023206	0.760063	Dn
CASC19	1.97413	4.31469	0.0237612	0.776503	Up
HIVEP3	2.08222	1.91523	0.0238762	0.776775	Up
NHSL2	2.08222	1.91523	0.0238762	0.776775	Up
TNFAIP3	1.95565	5.8208	0.0240006	0.779084	Up
SLPI	-2.04897	2.93262	0.0242231	0.78456	Dn
MPRIP	-1.9393	8.65894	0.0244767	0.791017	Dn
INPP5D	2.07481	1.96681	0.0247517	0.796607	Up
NPNT	2.01793	2.90486	0.024759	0.796607	Up
DMKN	1.98171	3.76432	0.0250828	0.801184	Up
JUN	1.93794	6.01737	0.0251085	0.801184	Up
SAMD9	1.98468	3.56856	0.0251164	0.801184	Up
FOSB	2.32042	0.750248	0.0251212	0.801184	Up
CDKN2D	-2.13031	1.80918	0.025344	0.806525	Dn
AC109460.3	-2.45226	0.67486	0.0254617	0.808505	Dn
ARX	-2.07155	2.05314	0.0255931	0.810026	Dn
ZNF304	2.05796	1.95361	0.0258084	0.810026	Up
LINC00284	-2.52306	0.496812	0.025843	0.810026	Dn
AC091167.2	2.37524	0.459123	0.025843	0.810026	Up
AL133500.1	2.37524	0.459123	0.025843	0.810026	Up
NEK10	2.37524	0.459123	0.025843	0.810026	Up
ZEB2	2.10812	1.87579	0.0260425	0.813646	Up
COL4A3	-2.01999	2.72248	0.0260702	0.813646	Dn
LYPD6	-2.66786	0.328646	0.0262636	0.817932	Dn
LINC00319	-2.24542	1.04315	0.0265767	0.820203	Dn
ACVRL1	2.46786	0.0955055	0.0267078	0.820203	Up
TRIM15	2.46786	0.0955055	0.0267078	0.820203	Up
FOXA3	1.94262	3.60448	0.0270213	0.820203	Up
ZNF883	2.28274	0.862766	0.0270462	0.820203	Up
AC103718.1	2.90509	-0.20601	0.0271201	0.820203	Up
CFAP206	2.90509	-0.20601	0.0271201	0.820203	Up
KPNA7	2.90509	-0.20601	0.0271201	0.820203	Up
RASGRP3	2.90509	-0.20601	0.0271201	0.820203	Up
VXN	2.90509	-0.20601	0.0271201	0.820203	Up
ARHGDIB	2.50598	-0.154199	0.0271201	0.820203	Up
GGT3P	2.50598	-0.154199	0.0271201	0.820203	Up
TNF	2.50598	-0.154199	0.0271201	0.820203	Up
BAMBI	1.9043	7.15428	0.0271744	0.820203	Up
KIF21B	-1.93696	4.15638	0.0271806	0.820203	Dn
ANTXR2	2.02987	2.03999	0.027455	0.826769	Up
MGAM	-2.05398	2.2238	0.0276478	0.830375	Dn
PLEKHG5	1.95227	3.24975	0.0276887	0.830375	Up
DCP2	1.90137	5.8631	0.0279975	0.836953	Up
SMARCD3	-1.92376	4.04363	0.0280487	0.836953	Dn
AC010132.3	-2.04592	1.96598	0.0280803	0.836953	Dn
NTN4	1.88588	6.98971	0.0286573	0.851697	Up
WWTR1	-1.88337	7.37989	0.0287842	0.851697	Dn
ISM2	2.25108	0.967221	0.0287978	0.851697	Up
AC020904.2	-2.48257	0.465439	0.028984	0.851697	Dn
PRPH	-2.48257	0.465439	0.028984	0.851697	Dn
ACY3	2.32651	0.422064	0.028984	0.851697	Up
DLGAP3	2.32651	0.422064	0.028984	0.851697	Up
AKR1C1	-1.87632	9.46606	0.0291398	0.854552	Dn
KLB	2.01187	2.22091	0.0293394	0.857296	Up
PSMB8	1.97737	2.48239	0.029351	0.857296	Up
PSCA	2.33103	0.225646	0.0298844	0.86766	Up
PSG4	2.33103	0.225646	0.0298844	0.86766	Up
RASGRF2	2.33103	0.225646	0.0298844	0.86766	Up
AC012513.3	-1.96311	2.89977	0.0300034	0.869381	Dn
SERPINA3	1.87449	5.54439	0.0301302	0.871326	Up
IGF2	2.06099	1.77658	0.0301972	0.871532	Up
GBP2	1.99767	2.20983	0.030374	0.874904	Up
OLFML3	1.88262	4.6431	0.0304571	0.875567	Up
TSPAN17	-1.86622	5.91793	0.0306925	0.880596	Dn
LINC00842	-1.89482	4.06573	0.0308765	0.884135	Dn
MIR210HG	-2.19007	1.00035	0.0312338	0.89252	Dn
IL15	-1.98997	1.98964	0.0313993	0.89252	Dn
EYA2	1.91399	3.364	0.0314043	0.89252	Up
CPM	1.90441	3.55755	0.0314142	0.89252	Up
C3	1.84672	9.75201	0.0316029	0.896132	Up
EFNA1	1.85441	5.9548	0.0317431	0.89836	Up
SOX8	-1.98828	1.92127	0.0319308	0.901921	Dn
HOXD1	2.82755	-0.264497	0.0322415	0.901957	Up
AC006058.3	-2.53209	-0.1254	0.0322415	0.901957	Dn
AL118505.1	-2.53209	-0.1254	0.0322415	0.901957	Dn
VEGFD	-2.53209	-0.1254	0.0322415	0.901957	Dn
AQP1	2.42845	-0.21056	0.0322415	0.901957	Up
NID1	1.97453	2.09767	0.0323878	0.903217	Up
HHIPL2	-1.84672	6.26545	0.0324105	0.903217	Dn
NLRP1	2.05091	1.48894	0.0326667	0.90862	Up
CEACAM5	1.92932	2.445	0.0329989	0.916113	Up
HRH1	2.02205	1.74635	0.0331638	0.917625	Up
UNC93B1	-1.8325	7.06621	0.0331793	0.917625	Dn
BRSK1	1.8812	3.1724	0.0332497	0.917829	Up
AC078850.1	3.11991	-0.519353	0.0336648	0.92057	Up
PCDHB9	3.11991	-0.519353	0.0336648	0.92057	Up
ZNF542P	3.11991	-0.519353	0.0336648	0.92057	Up
KCNQ2	-2.80378	-0.395361	0.0336648	0.92057	Dn
PI3	-2.80378	-0.395361	0.0336648	0.92057	Dn
2025-09-03	1.90065	2.72487	0.0342139	0.932326	Up
KIF25-AS1	2.03499	1.13021	0.0342226	0.932326	Up
FHL3	1.86214	3.36231	0.0342927	0.932494	Up
NEDD4	1.81885	7.25998	0.0343586	0.932544	Up
KCNJ2	-2.03377	1.65136	0.0346902	0.939795	Dn
AC016205.1	-2.34302	0.590321	0.0348643	0.942759	Dn
TIPARP	1.81771	5.49583	0.0355229	0.958791	Up
CYTH4	2.33729	-0.00107383	0.0360131	0.970222	Up
LTBP1	1.80071	6.23142	0.0365368	0.977241	Up
KREMEN1	-1.81429	4.76194	0.0365412	0.977241	Dn
CIDEC	2.00291	1.45208	0.036627	0.977241	Up
ACSL5	2.22383	0.34508	0.0366724	0.977241	Up
COX6B2	2.22383	0.34508	0.0366724	0.977241	Up
PIK3AP1	1.89295	2.30039	0.0367346	0.977241	Up
SLITRK6	-2.03838	1.15022	0.0367901	0.977241	Dn
HOXA1	1.83655	3.36147	0.03681	0.977241	Up
SIVA1	-1.80028	5.44121	0.0370338	0.981396	Dn
VAMP8	1.83293	3.60084	0.0372915	0.984711	Up
NAA38	-1.8111	4.63257	0.0375198	0.984711	Dn
EPHA4	1.92451	2.15312	0.0375323	0.984711	Up
CPPED1	1.79054	6.09121	0.0376945	0.984711	Up
SLC5A2	1.98364	1.35828	0.0378038	0.984711	Up
SET	-1.78093	8.2835	0.0379139	0.984711	Dn
TNC	1.87929	2.2899	0.0379544	0.984711	Up
VSTM2L	1.87929	2.2899	0.0379544	0.984711	Up
KCNJ6	1.86025	2.72363	0.0381627	0.984711	Up
AC017104.1	2.74562	-0.325354	0.0385026	0.984711	Up
GPR156	2.74562	-0.325354	0.0385026	0.984711	Up
LAPTM5	2.74562	-0.325354	0.0385026	0.984711	Up
AC004835.1	2.34651	-0.269118	0.0385026	0.984711	Up
AP000974.1	2.34651	-0.269118	0.0385026	0.984711	Up
EPN3	2.34651	-0.269118	0.0385026	0.984711	Up
FAM184A	2.34651	-0.269118	0.0385026	0.984711	Up
MARVELD3	2.34651	-0.269118	0.0385026	0.984711	Up
STRC	2.34651	-0.269118	0.0385026	0.984711	Up
TNFSF14	1.96915	1.57265	0.038514	0.984711	Up
SCN3A	2.13119	0.746939	0.0385682	0.984711	Up
AKR1C3	-1.77224	10.3916	0.0386713	0.984711	Dn
DUSP10	1.81515	3.78057	0.0387953	0.984711	Up
GPRIN2	-1.79091	5.06182	0.0388106	0.984711	Dn
LRRC26	-2.26531	0.530979	0.0388404	0.984711	Dn
NABP1	1.78377	5.4132	0.0389246	0.984711	Up
IFI27	2.27241	0.182199	0.0389831	0.984711	Up
PDE2A	2.27241	0.182199	0.0389831	0.984711	Up
SMIM11A	1.98963	1.27918	0.0391617	0.986533	Up
BDKRB2	1.79146	4.60363	0.0391906	0.986533	Up
IGFBP3	-1.76493	9.61354	0.0394668	0.991775	Dn
TPM1	1.76444	8.51662	0.0395879	0.993105	Up
CADM1	1.77078	5.85147	0.0397858	0.996354	Up
ADSSL1	-1.7879	4.08209	0.0399577	0.997712	Dn
COL7A1	1.76061	8.72089	0.0399769	0.997712	Up
SLCO4C1	2.1106	0.859602	0.040082	0.998624	Up
USP32P2	1.95722	1.33826	0.0401958	0.999749	Up
ANKRD44	1.89417	2.12981	0.040333	1	Up
SLC22A17	1.7863	4.34524	0.040489	1	Up
LSR	1.76156	5.89838	0.0405335	1	Up
MAP3K14-AS1	-1.8456	2.84251	0.0405673	1	Dn
NOTCH3	-1.7548	8.89731	0.0405985	1	Dn
CBFA2T3	2.15589	0.624857	0.0406832	1	Up
CNTNAP2	1.8786	2.07167	0.0412725	1	Up
AC243562.3	-2.35382	0.366854	0.0413763	1	Dn
DNAH11	2.09318	0.96419	0.0414211	1	Up
CCL22	3.02114	-0.591896	0.0417569	1	Up
FGF13	3.02114	-0.591896	0.0417569	1	Up
LINC01091	3.02114	-0.591896	0.0417569	1	Up
NR1I3	3.02114	-0.591896	0.0417569	1	Up
TUBB2B	1.78345	3.49759	0.0418744	1	Up
ELOVL7	1.77371	4.34478	0.0419158	1	Up
BTF3L4P2	2.26728	-0.0517954	0.0420281	1	Up
FAM133A	2.26728	-0.0517954	0.0420281	1	Up
SBK2	2.26728	-0.0517954	0.0420281	1	Up
TRG-AS1	2.26728	-0.0517954	0.0420281	1	Up
HLA-F	1.847	2.58969	0.0420543	1	Up
RTN4RL1	1.80834	3.02545	0.042185	1	Up
FAS	1.75785	4.78049	0.042304	1	Up
AC098614.1	1.87891	2.16294	0.0423452	1	Up
PPM1K	2.0459	1.03725	0.0426136	1	Up
TCTEX1D2	-1.833	2.79901	0.0431071	1	Dn
S1PR5	-1.80703	2.90987	0.043376	1	Dn
HS3ST6	-1.90915	1.99147	0.0434367	1	Dn
FAAH2	2.07324	0.831441	0.0436439	1	Up
PALM3	-2.04163	0.887241	0.0436439	1	Dn
PHF7	-2.04163	0.887241	0.0436439	1	Dn
SLC6A17	1.78479	3.24431	0.0439219	1	Up
C2orf72	-1.76829	3.82915	0.0439475	1	Dn
PRKAA2	1.74452	4.42891	0.043977	1	Up
TM4SF20	-1.73698	5.22741	0.0442077	1	Dn
PDAP1	-1.72702	6.70563	0.0442417	1	Dn
LIMA1	1.73981	4.75987	0.0442685	1	Up
F2	1.92548	1.4682	0.0444455	1	Up
MUC5AC	-1.72058	8.36269	0.0445153	1	Dn
NPBWR1	2.05851	0.937972	0.0448499	1	Up
SUSD1	1.7363	4.59958	0.0448768	1	Up
KCNK6	1.77066	3.40202	0.0448869	1	Up
ANKRD18EP	-2.16175	0.650579	0.0449855	1	Dn
GCHFR	-2.16175	0.650579	0.0449855	1	Dn
SALL2	1.7563	3.50975	0.0453398	1	Up
BCAS1	1.73857	4.13122	0.045415	1	Up
TMEM63C	1.79497	2.78758	0.0454574	1	Up
FBXO43	-1.84211	2.17094	0.045458	1	Dn
SPRY1	1.81309	2.31803	0.0456268	1	Up
RARRES3	2.01282	1.01232	0.0459152	1	Up
AC245041.1	-1.95915	1.09028	0.0459152	1	Dn
STC1	1.74332	3.80663	0.0459989	1	Up
AC145098.2	2.65874	-0.388781	0.0461955	1	Up
CHST1	2.65874	-0.388781	0.0461955	1	Up
PIGR	2.65874	-0.388781	0.0461955	1	Up
TLL2	2.65874	-0.388781	0.0461955	1	Up
TNFAIP8L3	2.65874	-0.388781	0.0461955	1	Up
NALT1	-2.39548	-0.225549	0.0461955	1	Dn
AC005696.4	2.25964	-0.330047	0.0461955	1	Up
EDN3	2.25964	-0.330047	0.0461955	1	Up
VIPR1	2.25964	-0.330047	0.0461955	1	Up
FLJ37453	-1.95173	1.40764	0.046309	1	Dn
DOC2B	-2.07851	0.760972	0.0463774	1	Dn
GEM	1.75963	3.18482	0.0465931	1	Up
WWC3	-1.70995	6.00197	0.0466145	1	Dn
AES	-1.70277	7.99643	0.0467057	1	Dn
MPZ	2.11328	0.263933	0.0467816	1	Up
STX8	-1.76215	3.45839	0.046799	1	Dn
SRPX2	1.7513	3.38725	0.0469773	1	Up
IGFLR1	-1.80203	2.33901	0.0471022	1	Dn
SULT2B1	-1.70874	5.69238	0.047314	1	Dn
AC159540.2	2.03488	0.802739	0.0475712	1	Up
DNAJB9	1.70865	4.98479	0.0476711	1	Up
RPP25L	-1.72573	3.73052	0.0480869	1	Dn
KIAA1324	1.82137	1.82715	0.0481549	1	Up
TIMM8B	-1.73098	3.68284	0.0482801	1	Dn
ABAT	1.87655	1.57035	0.0483082	1	Up
PARP8	2.08693	0.418328	0.0484502	1	Up
SUCO	1.69658	5.7684	0.048513	1	Up
ZSWIM3	1.87686	1.63539	0.0488722	1	Up
LIPH	1.6939	5.62442	0.0489763	1	Up
FRAT1	-1.86614	1.95865	0.0490826	1	Dn
PIEZO2	1.72271	3.69574	0.0491434	1	Up
MFSD14B	-1.68949	6.22878	0.0492176	1	Dn
SLC5A9	2.1937	-0.104288	0.049219	1	Up
LIMD2	1.71052	3.7551	0.0496272	1	Up
F2RL1	1.68037	6.86007	0.0497225	1	Up
TNFRSF13C	-2.12441	0.622443	0.0498142	1	Dn
R3HDM2	-1.6914	5.32497	0.0499494	1	Dn
CCND3	-1.6747	8.89312	0.0501354	1	Ns
TNFRSF12A	1.67398	7.48619	0.0504308	1	Ns
CFB	1.68188	5.46188	0.0506782	1	Ns
DTX2P1	-2.04386	0.734967	0.0509485	1	Ns
NKD1	1.68434	5.0495	0.0510486	1	Ns
TBC1D16	-1.67439	6.32202	0.0510655	1	Ns
ZNF697	1.73539	2.92232	0.0510975	1	Ns
MNS1	-1.77275	2.22106	0.0512791	1	Ns
AP002360.1	-2.42389	0.14196	0.0513877	1	Ns
ANK1	1.72404	2.81368	0.0514378	1	Ns
AC055811.4	-1.71199	3.19523	0.0519358	1	Ns
TMOD1	1.76109	2.31647	0.0521357	1	Ns
PCDHGB1	1.72635	2.91548	0.0521752	1	Ns
ZNF229	1.78243	1.79799	0.0526199	1	Ns
FRMD3	-1.67139	4.81627	0.0527242	1	Ns
HCN4	1.98656	0.884112	0.0527243	1	Ns
GALNT16	1.85034	1.4118	0.05274	1	Ns
HOXA-AS3	-2.26112	0.297034	0.0530068	1	Ns
SPTSSA	-1.65516	7.2384	0.0530485	1	Ns
ENPP4	1.852	1.48414	0.0532086	1	Ns
BAIAP3	1.78985	1.90746	0.0533103	1	Ns
B3GNT7	1.87313	1.00935	0.0534314	1	Ns
LAMP3	1.87313	1.00935	0.0534314	1	Ns
PRKCG	1.75472	2.51947	0.0535199	1	Ns
ANKRD1	1.69078	3.67152	0.0535784	1	Ns
DET1	-1.72336	2.81472	0.0538073	1	Ns
RIMBP3	1.71821	2.58567	0.0539057	1	Ns
ALX4	2.03467	0.380281	0.0542548	1	Ns
ANO9	2.03467	0.380281	0.0542548	1	Ns
LINC00973	1.83478	1.66575	0.054388	1	Ns
WISP2	-1.67623	4.01056	0.0548407	1	Ns
ROR1	1.6535	5.2224	0.0548911	1	Ns
ANKRD46	1.66649	4.21621	0.054925	1	Ns
PCDHGA2	1.76256	1.78319	0.0550277	1	Ns
TM4SF19	1.76256	1.78319	0.0550277	1	Ns
AC107027.3	-2.0467	0.56441	0.0552418	1	Ns
TOX3	1.77149	1.89373	0.0555784	1	Ns
PRIMA1	-2.322	-0.27846	0.0556964	1	Ns
SHROOM2	1.65995	3.95137	0.0557114	1	Ns
NFKBIZ	1.65875	3.99532	0.0564928	1	Ns
BIRC3	1.63071	6.81319	0.056648	1	Ns
TMEM265	1.68594	3.14931	0.0567111	1	Ns
BTF3L4	1.64516	4.84829	0.0567119	1	Ns
SNCG	1.71981	2.1693	0.0568501	1	Ns
FO681492.1	-1.71628	2.71032	0.0572831	1	Ns
CD70	1.70015	2.68823	0.0572831	1	Ns
MISP3	-1.68374	2.87758	0.0578791	1	Ns
EXOC3L2	1.80839	1.05596	0.0581057	1	Ns
PIK3R3	1.64873	3.55297	0.0581857	1	Ns
ITGA10	1.6528	3.20276	0.0589334	1	Ns
PCDHGB4	1.70967	2.20152	0.058977	1	Ns
AL138828.1	2.08072	0.0437698	0.0592434	1	Ns
BIN2	2.08072	0.0437698	0.0592434	1	Ns
SAMD14	2.08072	0.0437698	0.0592434	1	Ns
ALDH3A1	-1.60868	11.3357	0.059283	1	Ns
MYO15B	-1.6151	6.03064	0.0596774	1	Ns
RBFOX3	-1.61899	5.37105	0.0599106	1	Ns
ATP10D	1.6646	3.19241	0.059947	1	Ns
NIPAL2	1.73651	1.70904	0.0601017	1	Ns
MINCR	-2.21244	0.260768	0.0601929	1	Ns
TESK2	-2.21244	0.260768	0.0601929	1	Ns
ADRB2	2.05465	0.221654	0.0601929	1	Ns
DDAH1	1.61976	4.6688	0.0603274	1	Ns
PLCL2	1.65199	3.54042	0.0605785	1	Ns
RHOV	-1.62508	4.35161	0.0606248	1	Ns
DDX58	1.67137	2.99016	0.0606883	1	Ns
GSTM4	-1.65964	3.08087	0.0607949	1	Ns
PRX	-1.64468	3.70271	0.0608141	1	Ns
CILP2	1.98046	0.341246	0.0608637	1	Ns
SLC3A1	1.98046	0.341246	0.0608637	1	Ns
LRRC23	-1.63548	3.77615	0.060915	1	Ns
N4BP3	1.68883	2.14627	0.0609457	1	Ns
PTGS2	1.59856	7.63896	0.0611438	1	Ns
ST20-AS1	1.65272	3.36478	0.0612051	1	Ns
LAMA3	1.59802	7.3957	0.0612905	1	Ns
AC092868.1	1.97015	0.488002	0.0613522	1	Ns
MATN2	1.60592	5.60791	0.0615585	1	Ns
SLC7A1	-1.59713	6.77737	0.0616854	1	Ns
ARID3A	1.59793	5.8048	0.0620817	1	Ns
CUTC	-1.6102	4.52611	0.0621588	1	Ns
CRY2	1.61075	4.53444	0.0625906	1	Ns
MACROD2	1.78153	1.12456	0.0626207	1	Ns
HAVCR1	1.59183	6.52416	0.0626264	1	Ns
ZNF10	1.78767	1.21215	0.0627084	1	Ns
ACHE	1.77107	1.35318	0.0628393	1	Ns
MOXD1	1.78208	1.49989	0.0629291	1	Ns
FRMD4A	1.71473	2.12462	0.0631184	1	Ns
MSH5-SAPCD1	-1.69805	2.35048	0.0631334	1	Ns
AQP11	1.68425	2.40068	0.0631358	1	Ns
SERPINH1	1.58541	7.59091	0.0632194	1	Ns
FAM3C	1.58952	6.12004	0.0633871	1	Ns
RCN2	-1.59068	5.73455	0.0635299	1	Ns
ETS1	1.58796	5.74131	0.0637128	1	Ns
CIAO2A	-1.59222	5.44522	0.0638947	1	Ns
CTH	-1.63785	2.87288	0.0644982	1	Ns
LACTB	1.57666	6.81366	0.0648199	1	Ns
BTBD19	1.64233	2.49856	0.0648828	1	Ns
SAMD4A	1.5888	4.79378	0.0655409	1	Ns
EHD3	1.5926	4.06235	0.0660518	1	Ns
PCDH1	1.62319	2.73832	0.0661241	1	Ns
SPX	1.60471	3.59281	0.0664103	1	Ns
CORO2A	-1.58971	4.30413	0.0666265	1	Ns
DMRTA1	1.76462	1.2739	0.0668221	1	Ns
RAET1E-AS1	-1.64045	2.93224	0.0671175	1	Ns
PIK3IP1	1.65964	2.31334	0.0671439	1	Ns
2025-09-01	-1.81658	0.9843	0.0674815	1	Ns
SPATA17	1.76651	0.931841	0.0674815	1	Ns
ZNF608	1.76651	0.931841	0.0674815	1	Ns
ZNF708	1.76651	0.931841	0.0674815	1	Ns
ADAMTS6	2.5663	-0.455005	0.0674925	1	Ns
CRLF2	2.5663	-0.455005	0.0674925	1	Ns
PCDHB7	2.5663	-0.455005	0.0674925	1	Ns
TSPOAP1	2.5663	-0.455005	0.0674925	1	Ns
AC005840.2	-2.24458	-0.33346	0.0674925	1	Ns
AC112497.1	-2.24458	-0.33346	0.0674925	1	Ns
AL133215.2	-2.24458	-0.33346	0.0674925	1	Ns
AP003733.4	-2.24458	-0.33346	0.0674925	1	Ns
SLC25A1P5	-2.24458	-0.33346	0.0674925	1	Ns
SMG1P4	-2.24458	-0.33346	0.0674925	1	Ns
ZFP91-CNTF	-2.24458	-0.33346	0.0674925	1	Ns
ACVR1C	2.1672	-0.393549	0.0674925	1	Ns
MASP1	2.1672	-0.393549	0.0674925	1	Ns
MCF2L2	2.1672	-0.393549	0.0674925	1	Ns
PCDHA8	2.1672	-0.393549	0.0674925	1	Ns
ZNF841	2.1672	-0.393549	0.0674925	1	Ns
E2F8	-1.61334	3.07174	0.0679885	1	Ns
TMEM132A	1.55557	8.14279	0.0680013	1	Ns
PNRC2	1.55949	5.98062	0.0681402	1	Ns
ENTPD7	1.568	4.79652	0.0681447	1	Ns
RPL5P12	1.91972	0.451745	0.0682417	1	Ns
AC087741.3	-2.05047	0.370544	0.0684026	1	Ns
AC096887.2	-2.05047	0.370544	0.0684026	1	Ns
HIPK4	-2.05047	0.370544	0.0684026	1	Ns
TLR5	-2.05047	0.370544	0.0684026	1	Ns
AP000356.3	1.92412	0.301169	0.0684026	1	Ns
NPIPB14P	-2.25488	0.0166369	0.0684944	1	Ns
ESPNL	2.01071	-0.005357	0.0684944	1	Ns
PODNL1	2.01071	-0.005357	0.0684944	1	Ns
ST6GALNAC1	2.01071	-0.005357	0.0684944	1	Ns
UBA7	2.01071	-0.005357	0.0684944	1	Ns
AC010761.1	-2.16206	0.223533	0.0685071	1	Ns
AL451069.3	-2.16206	0.223533	0.0685071	1	Ns
OTUD7A	-2.16206	0.223533	0.0685071	1	Ns
TAF1A-AS1	-2.16206	0.223533	0.0685071	1	Ns
RNF125	1.99354	0.178152	0.0685071	1	Ns
SMOC1	1.58369	3.85971	0.0686645	1	Ns
ATF5	1.56294	5.24117	0.068666	1	Ns
PCDHGB5	1.61816	2.8585	0.0687111	1	Ns
KLHDC7A	1.57883	4.08233	0.069074	1	Ns
CTDSP2	-1.5499	6.82925	0.0693793	1	Ns
CPLX2	-1.54539	10.9596	0.0695213	1	Ns
DOCK4	1.55518	5.39859	0.0695611	1	Ns
PXN-AS1	-1.69567	1.63019	0.0695848	1	Ns
CCL20	1.63995	2.18863	0.0697813	1	Ns
FAM222A	1.60242	3.10692	0.0702321	1	Ns
AK5	1.7245	1.39001	0.0704504	1	Ns
TUBB2A	1.54784	5.45887	0.070498	1	Ns
MNX1-AS1	-1.68259	1.99693	0.0708786	1	Ns
AMBP	1.5781	3.55879	0.07095	1	Ns
SESN1	1.55205	4.74172	0.0711348	1	Ns
HIC2	1.54739	4.84621	0.0716754	1	Ns
EIF4H	-1.53313	8.63306	0.0718346	1	Ns
NPL	1.66782	1.76615	0.0720455	1	Ns
IL1RAP	1.56139	3.64336	0.0722042	1	Ns
PTBP3	1.53149	7.87461	0.0722439	1	Ns
MYBL1	1.56524	3.86916	0.0722787	1	Ns
ARHGAP23	-1.5627	3.95243	0.0725143	1	Ns
MEGF9	-1.53057	7.2723	0.0726174	1	Ns
TMEM150A	1.56726	3.57913	0.0726229	1	Ns
BTG2	1.53597	5.41176	0.0728122	1	Ns
ANKH	-1.54249	4.8944	0.0728689	1	Ns
RASSF5	1.55917	3.65505	0.0729965	1	Ns
EPB41L4A	-1.57412	3.06765	0.0731242	1	Ns
KCNC4	-1.56361	3.59183	0.0735689	1	Ns
GRB10	1.52903	6.0049	0.0737697	1	Ns
LCOR	1.52855	6.15535	0.0738886	1	Ns
SRPX	1.54254	4.46874	0.073929	1	Ns
CASTOR3	-1.53182	5.63464	0.0740121	1	Ns
PLEKHH2	1.53938	4.62238	0.0741034	1	Ns
EMID1	1.87035	0.682091	0.0743668	1	Ns
C2orf48	-1.84064	0.738196	0.0743668	1	Ns
MUC2	-1.84064	0.738196	0.0743668	1	Ns
AL441992.1	-1.71689	1.41249	0.074614	1	Ns
F3	1.69759	1.37045	0.074614	1	Ns
RELB	1.52393	5.81237	0.0746268	1	Ns
POLE3	-1.52493	5.91054	0.0747605	1	Ns
KRT15	1.60057	2.12115	0.0750123	1	Ns
CD27-AS1	-1.89628	0.625812	0.0751433	1	Ns
SPATA18	1.54726	3.68553	0.0753373	1	Ns
S100A11	-1.51476	6.84573	0.0756867	1	Ns
FLRT2	1.86747	0.414592	0.0760218	1	Ns
CD55	-1.51408	6.32723	0.0762378	1	Ns
THBD	1.51956	4.88227	0.076342	1	Ns
SNHG21	-1.6595	1.6736	0.0763884	1	Ns
DICER1-AS1	-1.77368	1.17504	0.0765248	1	Ns
OVGP1	1.69479	1.14485	0.0765248	1	Ns
KIF26A	-1.53375	4.08254	0.0769567	1	Ns
MRAP2	-2.00337	0.336116	0.0770186	1	Ns
PFKFB4	1.52946	4.12342	0.0770812	1	Ns
FBXO10	1.52121	4.59545	0.077129	1	Ns
SIM2	1.51752	5.02347	0.0774656	1	Ns
TMEM38A	1.58551	2.68443	0.0779331	1	Ns
AC023024.2	-1.72192	1.03053	0.078184	1	Ns
MYCL	-1.69498	1.47847	0.0782965	1	Ns
VAV1	1.5393	3.73041	0.0783748	1	Ns
DCBLD2	1.49629	10.3355	0.0784797	1	Ns
KCNJ16	1.62504	2.01645	0.0786539	1	Ns
PHGDH	-1.49798	6.50063	0.0789477	1	Ns
DGKA	1.51676	4.3807	0.0790364	1	Ns
AC017083.2	-2.19384	-0.0277747	0.0794209	1	Ns
MIATNB	-2.19384	-0.0277747	0.0794209	1	Ns
PIFO	1.93714	-0.0561414	0.0794209	1	Ns
TFAP2E	1.93714	-0.0561414	0.0794209	1	Ns
PWAR6	1.61525	1.67523	0.0795021	1	Ns
ABCC5	1.49608	5.86029	0.0799453	1	Ns
TFF1	1.78923	0.740318	0.0802978	1	Ns
SOD2	1.48732	8.20136	0.0804284	1	Ns
ZRANB1	-1.51497	4.05666	0.0807351	1	Ns
LINC02015	1.94736	-0.273735	0.0808136	1	Ns
ZNF772	1.67586	1.5484	0.0809918	1	Ns
GCC2	1.48875	6.30185	0.0812042	1	Ns
MKI67	-1.48012	8.70593	0.081779	1	Ns
MCTP1	1.51296	3.78397	0.0820404	1	Ns
PLK3	1.51296	3.78397	0.0820404	1	Ns
AC233699.1	2.46753	-0.524281	0.0822175	1	Ns
AL589182.1	2.46753	-0.524281	0.0822175	1	Ns
CHRM4	2.46753	-0.524281	0.0822175	1	Ns
EPHA5-AS1	2.46753	-0.524281	0.0822175	1	Ns
GPR137C	2.46753	-0.524281	0.0822175	1	Ns
TSPAN2	2.46753	-0.524281	0.0822175	1	Ns
UGCG	1.48298	5.78508	0.0824606	1	Ns
SMIM3	1.56128	2.61303	0.0825896	1	Ns
NFIB	-1.48688	5.11019	0.0827497	1	Ns
EIF5A2	1.51549	3.52692	0.0829829	1	Ns
ZNF554	1.68225	1.05305	0.0830409	1	Ns
SFRP1	1.47998	5.48603	0.0833654	1	Ns
KRT18	-1.47114	11.6789	0.0833855	1	Ns
DEPTOR	-1.56676	2.56459	0.0835279	1	Ns
UPK3B	-1.48869	4.71816	0.0835445	1	Ns
SLC27A5	-1.53135	3.08483	0.0838588	1	Ns
SCML2	1.48153	5.09428	0.0839584	1	Ns
HSPB8	1.49911	3.87672	0.084018	1	Ns
SNHG19	-1.58935	2.2259	0.0842532	1	Ns
AC087203.3	1.66791	0.95509	0.0843619	1	Ns
NDUFA6-DT	-1.66197	0.987224	0.0843619	1	Ns
STARD5	-1.66197	0.987224	0.0843619	1	Ns
PCDHB5	1.51585	2.94063	0.0845046	1	Ns
RNF103	-1.4824	4.8432	0.084635	1	Ns
IQGAP2	-1.47586	5.47872	0.0848851	1	Ns
FGFR3	-1.49064	4.30305	0.0849559	1	Ns
TMEM47	-1.49627	4.10211	0.0850253	1	Ns
PTPRN2	1.49379	3.75804	0.0850698	1	Ns
HS3ST3B1	-1.53829	2.47207	0.0851151	1	Ns
TRIQK	-1.51727	3.12158	0.0861618	1	Ns
FHOD3	1.52208	2.83466	0.0862195	1	Ns
AC022211.2	-1.55413	2.10772	0.0863637	1	Ns
RHOF	-1.45956	6.79456	0.0865491	1	Ns
SPATA32	-1.95469	0.300816	0.0868839	1	Ns
AC127496.1	1.86549	0.259995	0.0868839	1	Ns
PDE8B	-1.52196	2.49646	0.0868841	1	Ns
PIP5KL1	-1.5465	2.36336	0.0869654	1	Ns
TCIM	1.4572	6.61297	0.0873559	1	Ns
TPM1-AS	1.62767	1.3875	0.0875434	1	Ns
HEG1	1.46851	4.88854	0.0875726	1	Ns
PPP1R1C	1.62937	1.09824	0.0876461	1	Ns
FOXC1	-1.46856	4.8805	0.0878167	1	Ns
ELFN2	1.46853	4.7049	0.0879491	1	Ns
SH3BP2	-1.52318	2.84567	0.0880705	1	Ns
PRR11	-1.46078	5.06792	0.0885692	1	Ns
BEX2	1.64221	1.33054	0.0888733	1	Ns
MAP7D2	1.49707	3.24978	0.0889145	1	Ns
EOMES	1.57973	1.94027	0.0889342	1	Ns
AP000526.1	1.64757	1.02843	0.0892595	1	Ns
AC093249.6	-1.99941	0.105454	0.0893568	1	Ns
MELTF-AS1	-1.99941	0.105454	0.0893568	1	Ns
MRO	-1.99941	0.105454	0.0893568	1	Ns
PIWIL2	1.86296	0.0871819	0.0893568	1	Ns
TEX19	1.78046	0.617919	0.0896088	1	Ns
HSD11B2	-1.76691	0.684754	0.0896088	1	Ns
RTL5	1.47104	3.88895	0.0896131	1	Ns
RIMBP3B	1.62704	1.51309	0.0897684	1	Ns
AC007240.1	-1.57695	1.91936	0.0899201	1	Ns
CRYM	1.53329	2.18528	0.089968	1	Ns
NAP1L5	1.62843	1.25004	0.090354	1	Ns
PTCH1	-1.4729	3.54223	0.0904168	1	Ns
ARRDC4	1.56468	2.01461	0.0904216	1	Ns
E2F2	-1.45449	4.70064	0.0905769	1	Ns
UBE2Z	-1.43854	7.2176	0.0907879	1	Ns
TP53INP1	1.45114	4.72847	0.0908564	1	Ns
MUC16	-1.58782	1.87109	0.090983	1	Ns
SBK3	-1.63104	0.965056	0.0910966	1	Ns
NLRC3	1.63055	0.928774	0.0910966	1	Ns
FAM122B	-1.4481	5.04696	0.0912952	1	Ns
CHCHD5	-1.4553	4.24672	0.0913102	1	Ns
MXD3	-1.46273	3.81082	0.0915809	1	Ns
COQ9	-1.43861	5.69862	0.0918344	1	Ns
SLC13A4	-1.77476	0.537945	0.0919722	1	Ns
ENTPD2	-1.54371	2.23666	0.092062	1	Ns
TUBB3	1.43101	7.4312	0.0923022	1	Ns
ARHGAP18	-1.43748	5.68659	0.0923581	1	Ns
AC114490.3	-2.1301	-0.0736497	0.0923645	1	Ns
NRL	-2.1301	-0.0736497	0.0923645	1	Ns
TBX2-AS1	-2.1301	-0.0736497	0.0923645	1	Ns
AL359643.3	1.8596	-0.108698	0.0923645	1	Ns
GPRC5D	1.8596	-0.108698	0.0923645	1	Ns
DAAM1	1.46126	3.58337	0.0925413	1	Ns
FAM167A	1.44	4.83504	0.0926593	1	Ns
SH2B2	-1.4755	3.43898	0.0926655	1	Ns
TMEM156	1.44244	4.6105	0.0929909	1	Ns
CLDN7	1.55625	1.5783	0.093058	1	Ns
GPD1	1.55625	1.5783	0.093058	1	Ns
ZNF443	1.7167	0.796264	0.093207	1	Ns
ID1	-1.4243	8.3538	0.0935568	1	Ns
SCN1B	1.44077	4.39412	0.0941988	1	Ns
CXCL8	1.42696	5.52064	0.0943956	1	Ns
NES	1.45365	3.40924	0.0944127	1	Ns
AC138894.1	1.75691	0.337411	0.0947889	1	Ns
AP000892.3	1.75691	0.337411	0.0947889	1	Ns
SOCS1	1.75691	0.337411	0.0947889	1	Ns
RPS6KA5	-1.57154	1.85925	0.0948633	1	Ns
ZNF675	1.55388	1.96485	0.094957	1	Ns
TIAM2	1.48262	2.41267	0.0951583	1	Ns
ITIH2	1.47457	2.68063	0.0952266	1	Ns
BFSP1	1.44055	3.98082	0.095949	1	Ns
TPPP3	1.61205	1.0034	0.0960082	1	Ns
FMO4	1.85492	-0.334737	0.0960753	1	Ns
PTPRB	1.85492	-0.334737	0.0960753	1	Ns
SIDT1	1.85492	-0.334737	0.0960753	1	Ns
EFEMP1	1.59813	1.22853	0.0961542	1	Ns
LAT2	1.52378	1.60983	0.0962172	1	Ns
SLC2A6	1.41968	5.29903	0.0967034	1	Ns
MRRF	-1.50131	2.55138	0.0968479	1	Ns
TCN2	1.43415	3.94597	0.096909	1	Ns
RRAS2	-1.43154	4.43052	0.0971544	1	Ns
AGAP2	1.46627	2.7476	0.0973857	1	Ns
AC022400.7	-1.57708	1.74386	0.0976625	1	Ns
PNMA6A	1.44749	3.32828	0.0977206	1	Ns
ASB4	1.48494	2.50203	0.0977311	1	Ns
MAML2	1.45923	3.22233	0.0978965	1	Ns
EVA1C	-1.40744	6.28618	0.0981697	1	Ns
DLL1	1.69079	0.877847	0.0984435	1	Ns
LRRC56	1.59219	0.901987	0.0984435	1	Ns
RAB40A	1.59219	0.901987	0.0984435	1	Ns
ZNF583	1.59219	0.901987	0.0984435	1	Ns
POU3F3	-1.68919	0.629181	0.098532	1	Ns
SHLD2P1	-1.68919	0.629181	0.098532	1	Ns
LINC00707	1.46368	2.76926	0.0987869	1	Ns
MR1	1.41984	4.46609	0.0991114	1	Ns
PPP1R3C	1.42118	4.03493	0.0995187	1	Ns
TMCC2	1.4577	3.00115	0.0995332	1	Ns
CKMT1A	1.48254	2.03614	0.0996896	1	Ns
PCSK1N	1.40139	5.9741	0.0999695	1	Ns
RNF38	1.4037	5.35696	0.100156	1	Ns
NR6A1	1.41386	4.27391	0.100171	1	Ns
IGF2BP1	1.3951	8.51359	0.100176	1	Ns
FZD8	-1.41483	4.45372	0.100306	1	Ns
AL513318.2	1.52348	1.76197	0.100481	1	Ns
RIN2	1.39947	6.08143	0.100519	1	Ns
MFF	-1.39636	6.23357	0.100805	1	Ns
PLEKHB2	1.39345	7.31116	0.100896	1	Ns
WNT7B	-1.39365	6.87452	0.101116	1	Ns
ZNF773	1.46253	2.45732	0.101368	1	Ns
RTEL1	-1.42122	3.95156	0.101419	1	Ns
PRKCE	1.40847	4.6051	0.101432	1	Ns
C7orf43	1.40638	4.67193	0.101543	1	Ns
NGEF	-1.41185	3.91978	0.101566	1	Ns
NDUFA7	-1.42145	3.6186	0.101784	1	Ns
FAM20B	-1.39222	6.43871	0.101816	1	Ns
PCDHGA6	1.71764	0.448056	0.101955	1	Ns
TBILA	1.71764	0.448056	0.101955	1	Ns
ZNF189	1.41147	3.91939	0.102192	1	Ns
PPEF1	-1.59481	1.23686	0.102377	1	Ns
DOCK2	1.79296	0.0395492	0.102415	1	Ns
FAM151B	1.79296	0.0395492	0.102415	1	Ns
LINC01012	1.79296	0.0395492	0.102415	1	Ns
ADGRE2	1.45234	2.42083	0.102438	1	Ns
TXNIP	1.51694	1.93836	0.102519	1	Ns
AC005077.4	1.40629	3.98567	0.102854	1	Ns
CDK5R2	1.50744	1.54374	0.102905	1	Ns
SERPINB7	1.50744	1.54374	0.102905	1	Ns
GPRC5C	1.39369	5.52352	0.102916	1	Ns
BCO1	1.43418	2.94408	0.102928	1	Ns
CDC42EP3	1.3928	5.32628	0.103165	1	Ns
GXYLT1	1.38753	5.88591	0.103182	1	Ns
SRSF12	1.57563	0.977947	0.103337	1	Ns
TUB	-1.39756	4.88765	0.103439	1	Ns
NKX2-8	-1.56199	1.38202	0.103815	1	Ns
SPC25	-1.41228	3.3564	0.104098	1	Ns
EPHX1	-1.37842	8.10919	0.104267	1	Ns
SLC29A3	1.39376	4.49576	0.104414	1	Ns
DGCR5	-1.43403	2.91514	0.104556	1	Ns
CHGA	1.70206	0.678702	0.104559	1	Ns
PCDHB14	1.70206	0.678702	0.104559	1	Ns
AC127502.1	-1.65402	0.741424	0.104559	1	Ns
FAM13B	1.38948	4.87365	0.104722	1	Ns
KIRREL1	1.37818	6.95028	0.104728	1	Ns
FAM174B	1.41522	3.0478	0.104882	1	Ns
MSMO1	1.38736	5.13012	0.105218	1	Ns
GRIN2D	1.37835	6.21322	0.105364	1	Ns
CPE	1.40472	3.56886	0.105398	1	Ns
PEA15	1.37862	6.24393	0.105416	1	Ns
NAMPT	-1.37155	8.31616	0.105895	1	Ns
SOX4	1.37458	6.38642	0.105994	1	Ns
CFAP57	-1.78477	0.374235	0.106097	1	Ns
SCAMP5	1.37781	5.25687	0.106271	1	Ns
TMEM86A	1.55495	1.2686	0.10628	1	Ns
CRABP2	1.55278	0.874713	0.106464	1	Ns
TEX22	1.55278	0.874713	0.106464	1	Ns
NTRK3	-1.37256	6.32537	0.106489	1	Ns
NTAN1	-1.41225	3.54812	0.10652	1	Ns
MMP2	1.44164	2.38339	0.106555	1	Ns
CEACAM1	1.38902	4.46484	0.10672	1	Ns
ELOVL4	1.42173	2.59208	0.106755	1	Ns
CD22	1.43608	2.43846	0.107036	1	Ns
E2F1	-1.37021	5.81756	0.107375	1	Ns
FGG	1.46916	2.27718	0.107376	1	Ns
TRIM14	-1.37451	5.46138	0.107414	1	Ns
PELI2	-1.45001	2.51434	0.107479	1	Ns
HAP1	1.40515	3.28205	0.107674	1	Ns
ENO2	1.36773	5.82155	0.108157	1	Ns
GATM	1.389	4.03066	0.108311	1	Ns
BEX4	1.68461	0.550882	0.108468	1	Ns
AC137932.3	-1.64871	0.60054	0.108468	1	Ns
SPRY2	1.41533	2.9306	0.109122	1	Ns
TTLL11	1.45088	2.29665	0.109241	1	Ns
TCEAL8	1.41907	2.76046	0.109259	1	Ns
FRS2	1.36637	4.97743	0.109555	1	Ns
FAM156B	-1.40808	2.92189	0.110072	1	Ns
FSIP1	-1.58987	0.820967	0.110107	1	Ns
COL26A1	-1.49253	1.48317	0.11073	1	Ns
PRR34-AS1	-1.8521	0.22741	0.111207	1	Ns
AL662797.1	-1.79794	0.189201	0.111207	1	Ns
PPP1R26-AS1	-1.79794	0.189201	0.111207	1	Ns
ST20-MTHFS	-1.79794	0.189201	0.111207	1	Ns
AC008555.8	1.74057	0.174106	0.111207	1	Ns
USP2-AS1	1.74057	0.174106	0.111207	1	Ns
GRIP2	1.53826	0.952054	0.111301	1	Ns
POC1B-GALNT4	-1.47422	1.60643	0.111363	1	Ns
HECW2	1.37859	3.68669	0.111524	1	Ns
DCBLD1	1.35057	6.30781	0.112074	1	Ns
CCDC58	-1.41419	2.64978	0.112404	1	Ns
RASEF	1.35755	4.84022	0.112538	1	Ns
RAI14	1.34597	7.45431	0.112574	1	Ns
NOVA1	1.40241	2.67809	0.112616	1	Ns
TMEM92	1.38453	3.23522	0.112633	1	Ns
DMBX1	-1.68766	0.476128	0.113175	1	Ns
LINC01588	1.66342	0.410855	0.113175	1	Ns
SLC2A3	1.34073	8.48198	0.113645	1	Ns
PGD	-1.33926	10.716	0.11381	1	Ns
FBXL7	1.45691	1.50836	0.113938	1	Ns
PHLDA2	1.35668	4.24086	0.114119	1	Ns
GPR141	1.65642	0.646919	0.114404	1	Ns
MYPN	1.65642	0.646919	0.114404	1	Ns
RFPL2	1.65642	0.646919	0.114404	1	Ns
SETP3	-1.61668	0.714993	0.114404	1	Ns
B3GNT5	1.36689	3.80305	0.114484	1	Ns
ZNF853	1.45849	1.71605	0.114647	1	Ns
LPAR1	-1.34487	5.71759	0.114654	1	Ns
IDS	1.3377	7.41549	0.114743	1	Ns
LYPD1	1.39235	2.97405	0.114768	1	Ns
GFOD1	-1.3762	3.43824	0.11493	1	Ns
AL606970.1	1.61086	0.821836	0.115226	1	Ns
RCBTB2	1.61086	0.821836	0.115226	1	Ns
SYCP2	1.61086	0.821836	0.115226	1	Ns
TENM4	1.61086	0.821836	0.115226	1	Ns
IFRD2	-1.33789	6.29345	0.115415	1	Ns
CA12	-1.33252	9.51795	0.115663	1	Ns
C8orf37	-1.3826	2.92861	0.115736	1	Ns
SYNC	-1.37486	3.36638	0.116451	1	Ns
CLEC4E	1.51471	1.30758	0.116548	1	Ns
DISP2	1.51471	1.30758	0.116548	1	Ns
ARHGAP31	1.39256	2.64681	0.116558	1	Ns
RXRA	-1.331	6.80836	0.116887	1	Ns
ZNF222	1.45116	1.55881	0.116992	1	Ns
GALNT9	1.45346	1.75988	0.117281	1	Ns
GRIN3A	-1.8798	0.0207749	0.117663	1	Ns
CSF3	1.71938	-0.00963861	0.117663	1	Ns
MYO5B	1.33246	4.90921	0.118297	1	Ns
SLC35D2	1.32763	5.4112	0.118729	1	Ns
ACADL	-1.73608	0.339852	0.118946	1	Ns
CYP26A1	-1.73608	0.339852	0.118946	1	Ns
MAPK13	1.69829	0.297284	0.118946	1	Ns
TRPM8	1.69829	0.297284	0.118946	1	Ns
CLDN2	-1.32232	7.20343	0.118981	1	Ns
MRPS36	-1.3619	3.14197	0.119107	1	Ns
TROAP	-1.33744	4.40681	0.119108	1	Ns
FGD4	1.38088	2.63856	0.119346	1	Ns
PLLP	1.34515	3.639	0.119613	1	Ns
ANKRD20A5P	1.41637	2.13769	0.119624	1	Ns
NEB	-1.43473	1.92314	0.119759	1	Ns
SYT12	-1.43473	1.92314	0.119759	1	Ns
LHX9	-1.55437	0.795991	0.11983	1	Ns
TTC3P1	1.48953	1.47452	0.119947	1	Ns
CYP4F35P	1.43097	1.49035	0.119947	1	Ns
RERG	1.43097	1.49035	0.119947	1	Ns
C16orf45	1.32573	5.00038	0.119964	1	Ns
ABCA11P	1.4937	1.22583	0.120008	1	Ns
IGF2BP2	1.32539	5.01859	0.120494	1	Ns
FES	1.38532	2.75925	0.120583	1	Ns
PITPNA-AS1	-1.42226	2.19197	0.121561	1	Ns
GPR157	1.31928	5.38767	0.121723	1	Ns
FUT4	1.34758	3.56664	0.121931	1	Ns
IGFBP4	-1.30878	10.2667	0.122022	1	Ns
AL118516.1	-1.46624	1.6643	0.12268	1	Ns
FBXO6	-1.46624	1.6643	0.12268	1	Ns
LEAP2	-1.46624	1.6643	0.12268	1	Ns
LINC01137	-1.33489	4.00849	0.122692	1	Ns
CHIC1	1.31812	4.67977	0.122822	1	Ns
NID2	-1.32911	3.94618	0.122885	1	Ns
EEF1A2	1.30678	7.9412	0.122911	1	Ns
GSTO2	1.42612	1.54141	0.122942	1	Ns
RIC3	1.42612	1.54141	0.122942	1	Ns
BIRC5	-1.30821	6.66932	0.1231	1	Ns
FNDC4	1.48503	1.28691	0.123564	1	Ns
NYNRIN	1.47012	1.13925	0.123933	1	Ns
GDF7	-1.57781	1.0334	0.124346	1	Ns
AP002851.1	-1.54752	1.01194	0.124346	1	Ns
SOCS2	1.32404	4.07521	0.124625	1	Ns
MDK	1.36917	2.36203	0.124675	1	Ns
CCDC184	1.34299	3.01518	0.124689	1	Ns
PRSS35	1.47058	0.818631	0.124805	1	Ns
AKAP2	1.30687	5.67234	0.124856	1	Ns
NDRG1	-1.30078	7.1053	0.124973	1	Ns
AMT	-1.57834	0.688051	0.125302	1	Ns
AC105105.1	1.42161	1.59074	0.125791	1	Ns
AC118758.3	-1.64206	0.444158	0.1258	1	Ns
AC100810.3	1.60709	0.372712	0.1258	1	Ns
ASAH2	1.60709	0.372712	0.1258	1	Ns
AL356488.3	-1.9935	-0.170201	0.126068	1	Ns
DCST1-AS1	-1.9935	-0.170201	0.126068	1	Ns
MESP2	-1.9935	-0.170201	0.126068	1	Ns
C2orf92	1.69079	-0.219653	0.126068	1	Ns
EVA1A	1.69079	-0.219653	0.126068	1	Ns
LRRC6	1.69079	-0.219653	0.126068	1	Ns
RSPH1	1.69079	-0.219653	0.126068	1	Ns
AC002996.1	-1.74166	0.149914	0.126182	1	Ns
AP002387.1	-1.74166	0.149914	0.126182	1	Ns
LRP2BP	-1.74166	0.149914	0.126182	1	Ns
FOXD4L1	1.67381	0.129252	0.126182	1	Ns
C17orf49	-1.30966	4.94141	0.126257	1	Ns
PISD	-1.29885	6.51274	0.126272	1	Ns
LRRC37A6P	1.46311	1.45608	0.126314	1	Ns
DUSP1	-1.2927	7.84383	0.126932	1	Ns
TSC22D2	1.30241	5.09543	0.127043	1	Ns
PHC2	-1.29966	5.3293	0.127351	1	Ns
ZNF669	1.46206	1.20398	0.127608	1	Ns
AC000093.1	1.36642	2.41788	0.127859	1	Ns
AIF1L	1.31916	3.34278	0.127903	1	Ns
SEMA4B	1.28782	7.95854	0.128263	1	Ns
AC084018.2	-1.53051	1.09866	0.128421	1	Ns
TRAM1	1.28563	8.4229	0.128774	1	Ns
GACAT2	-1.33116	3.22194	0.128853	1	Ns
COL6A1	1.29802	4.75509	0.129061	1	Ns
POU2F2	1.40063	1.52381	0.129233	1	Ns
VCAN	1.28343	9.27333	0.129272	1	Ns
DDIT4	-1.28283	8.62272	0.129561	1	Ns
ICAM5	-1.40236	1.90022	0.129581	1	Ns
ALDH3B1	-1.28195	8.12079	0.129939	1	Ns
EHBP1L1	-1.28457	6.63102	0.130068	1	Ns
EEPD1	1.29192	4.60229	0.130301	1	Ns
DTX3L	1.29785	4.2918	0.130353	1	Ns
RABL3	-1.31033	3.88455	0.130626	1	Ns
THBS1	1.28053	7.24382	0.130652	1	Ns
AREG	1.28179	6.23587	0.130728	1	Ns
ZC4H2	1.34376	2.66061	0.130803	1	Ns
PDE1C	1.45473	1.26595	0.131056	1	Ns
AC137767.1	-1.44097	1.29623	0.131056	1	Ns
CU639417.5	-1.44097	1.29623	0.131056	1	Ns
DNAJB5	1.33323	2.6051	0.131269	1	Ns
SNORC	-1.29904	4.19489	0.131278	1	Ns
METTL15	-1.29749	3.94734	0.131321	1	Ns
CA2	-1.37933	2.20299	0.131569	1	Ns
GALNTL6	1.58192	0.480716	0.131905	1	Ns
UNC5C	1.36581	2.1023	0.132256	1	Ns
ZC3HAV1L	1.30408	3.45784	0.132301	1	Ns
PPIF	1.2736	7.28794	0.132661	1	Ns
HAS2	1.31532	3.01414	0.132722	1	Ns
HMGCS1	1.27607	6.24144	0.132819	1	Ns
CHRNB2	1.37764	1.45366	0.133061	1	Ns
TIGAR	1.27615	5.63609	0.13314	1	Ns
POM121L9P	1.31777	2.8204	0.133468	1	Ns
AL355388.2	-1.6857	0.304597	0.133566	1	Ns
AC114490.1	1.63718	0.256058	0.133566	1	Ns
ERGIC1	-1.26887	8.72585	0.13364	1	Ns
RHOBTB2	1.27712	5.496	0.133641	1	Ns
ANXA9	1.32229	2.52211	0.133722	1	Ns
ADAR	-1.26735	7.96385	0.134285	1	Ns
PLXNA3	1.29758	3.77552	0.134301	1	Ns
AL390726.5	1.64185	-0.0604855	0.13551	1	Ns
LRMDA	1.64185	-0.0604855	0.13551	1	Ns
SCX	1.64185	-0.0604855	0.13551	1	Ns
SLC22A20P	1.64185	-0.0604855	0.13551	1	Ns
TMEM191B	1.64185	-0.0604855	0.13551	1	Ns
USP44	1.64185	-0.0604855	0.13551	1	Ns
RCOR2	-1.3099	2.87712	0.13568	1	Ns
LRP8	-1.26763	5.76747	0.135719	1	Ns
FLJ20021	-1.39192	1.5484	0.135886	1	Ns
SH3RF3	1.37469	1.50599	0.135886	1	Ns
SGK1	-1.28963	3.95343	0.136196	1	Ns
ADAMTS12	1.31962	2.69032	0.136335	1	Ns
FBXL19-AS1	-1.3416	2.43721	0.136531	1	Ns
GABPB1-IT1	-1.30188	3.46945	0.13661	1	Ns
IRS2	-1.26296	6.10777	0.136697	1	Ns
FAM149A	-1.40252	1.41976	0.137341	1	Ns
TNFSF12	-1.3197	2.38735	0.137347	1	Ns
AC010168.2	1.56056	0.581262	0.137374	1	Ns
WDR63	1.56056	0.581262	0.137374	1	Ns
AC009126.1	-1.49848	0.632549	0.137374	1	Ns
ZNF704	-1.29108	3.41204	0.137428	1	Ns
AC097478.1	2.06843	-0.459849	0.137436	1	Ns
FABP6	2.06843	-0.459849	0.137436	1	Ns
TMEM121B	2.06843	-0.459849	0.137436	1	Ns
ALG1L9P	1.75615	-0.398313	0.137436	1	Ns
RNF128	1.75615	-0.398313	0.137436	1	Ns
TTC34	1.75615	-0.398313	0.137436	1	Ns
RNF157	1.27831	4.23245	0.137496	1	Ns
EMB	1.28214	3.28735	0.138015	1	Ns
MPZL3	1.3821	1.80037	0.138159	1	Ns
NAV3	1.28276	3.88808	0.13895	1	Ns
HYAL3	1.2795	3.61662	0.139407	1	Ns
FAM135A	1.26115	5.07061	0.139456	1	Ns
AC008443.1	-1.37922	1.72203	0.139528	1	Ns
AC012184.2	-1.37922	1.72203	0.139528	1	Ns
NKAIN4	1.41998	0.871577	0.139635	1	Ns
VWCE	1.41998	0.871577	0.139635	1	Ns
FOXE1	1.27043	4.22692	0.139658	1	Ns
STXBP6	1.33192	2.04317	0.139703	1	Ns
RAB15	1.25112	6.73354	0.139771	1	Ns
KRT8	-1.24393	12.3195	0.140962	1	Ns
SLC4A8	1.43627	1.11607	0.141117	1	Ns
SPOPL	1.25623	4.50946	0.141364	1	Ns
ALDH1L2	-1.29207	3.13418	0.141591	1	Ns
THG1L	-1.26072	4.42022	0.141595	1	Ns
TXNDC16	-1.37564	1.77553	0.141802	1	Ns
PCK2	-1.24702	6.18378	0.14183	1	Ns
ALDH2	-1.24218	8.24387	0.141879	1	Ns
SPEG	1.2968	2.86722	0.142283	1	Ns
ADCY5	1.54221	0.675312	0.142299	1	Ns
GPRASP2	1.26454	3.95183	0.142463	1	Ns
RIMS3	-1.27001	3.93962	0.142843	1	Ns
ZNF223	1.34827	1.48796	0.142923	1	Ns
TUBB4A	1.24826	5.30169	0.142966	1	Ns
FHL2	1.24739	5.22285	0.143079	1	Ns
SERPINB9	1.24965	5.11304	0.14312	1	Ns
LINC00641	-1.27938	3.35226	0.143127	1	Ns
NUP50-DT	-1.34068	2.13433	0.143238	1	Ns
HDGFL3	-1.24625	5.57578	0.143334	1	Ns
B4GALNT4	1.25472	4.56405	0.143382	1	Ns
ABCA1	1.28123	3.21031	0.143443	1	Ns
AC010913.1	-1.68309	0.109484	0.143454	1	Ns
KISS1R	-1.68309	0.109484	0.143454	1	Ns
PRKAG2-AS1	-1.68309	0.109484	0.143454	1	Ns
DLL4	1.6038	0.0830217	0.143454	1	Ns
LINC00858	1.6038	0.0830217	0.143454	1	Ns
MIR9-3HG	1.6038	0.0830217	0.143454	1	Ns
TRIM74	1.6038	0.0830217	0.143454	1	Ns
AC005253.1	-1.48498	0.968007	0.143627	1	Ns
GOLGA7B	1.41316	0.949016	0.143627	1	Ns
TRPM2	1.26753	3.30664	0.143728	1	Ns
PDE3A	-1.23784	6.96323	0.143805	1	Ns
GPR39	1.25039	4.78527	0.143995	1	Ns
RAB26	-1.27179	3.71552	0.144165	1	Ns
TRIM67	1.32956	2.14588	0.144911	1	Ns
C14orf93	-1.25969	3.54969	0.144933	1	Ns
AC092683.1	1.34647	1.53908	0.145484	1	Ns
TCF19	-1.25183	3.99479	0.145691	1	Ns
KCNH4	1.52771	0.444367	0.145711	1	Ns
PRTG	1.23709	5.1125	0.145778	1	Ns
COL6A2	1.23804	5.03284	0.145884	1	Ns
SORT1	1.23398	5.63817	0.146236	1	Ns
ATF1	-1.25055	4.09011	0.146242	1	Ns
DNER	1.42766	0.789785	0.146755	1	Ns
ZNF827	1.24657	4.09789	0.147092	1	Ns
LRRFIP2	-1.23951	4.68278	0.147317	1	Ns
MUC20	1.39215	1.22313	0.147611	1	Ns
DGUOK-AS1	-1.92002	-0.221111	0.147965	1	Ns
AC007611.1	1.59835	-0.27835	0.147965	1	Ns
ARC	1.59835	-0.27835	0.147965	1	Ns
CLEC18C	1.59835	-0.27835	0.147965	1	Ns
FAM86B2	1.59835	-0.27835	0.147965	1	Ns
ZNF547	1.59835	-0.27835	0.147965	1	Ns
TRAM2-AS1	-1.32663	2.12449	0.148073	1	Ns
NALCN	1.28531	2.71158	0.148075	1	Ns
TIAM1	1.27974	2.20887	0.148082	1	Ns
EBF1	1.28395	2.57085	0.148084	1	Ns
MSL3P1	1.24343	3.88976	0.148434	1	Ns
KCTD12	-1.29417	2.68185	0.149201	1	Ns
MARCKSL1	1.22324	6.36037	0.149289	1	Ns
CORO7	1.22796	5.22069	0.149388	1	Ns
SMTN	1.22493	5.31053	0.149473	1	Ns
ZNF776	1.23896	3.7767	0.149535	1	Ns
CA8	1.23939	3.78735	0.150046	1	Ns
MYLIP	1.2487	3.75198	0.1501	1	Ns
AC027601.5	-1.6335	0.268425	0.150226	1	Ns
FLJ37035	-1.6335	0.268425	0.150226	1	Ns
AC007382.1	-1.57933	0.231287	0.150226	1	Ns
ATP6V1B1	-1.57933	0.231287	0.150226	1	Ns
AC207130.1	1.57337	0.213672	0.150226	1	Ns
PLD2	-1.22688	5.00739	0.150334	1	Ns
TNFRSF25	1.38804	1.28428	0.150535	1	Ns
CDKN2C	-1.23471	4.22639	0.150625	1	Ns
CXCL5	1.21454	8.46773	0.150627	1	Ns
CERKL	-1.43173	1.12162	0.150694	1	Ns
ZNF502	1.40159	1.09253	0.150694	1	Ns
ARHGEF4	1.24188	3.40102	0.150732	1	Ns
BRPF3	1.22396	5.2179	0.151151	1	Ns
RIN3	1.21862	5.53924	0.151255	1	Ns
CNTNAP3	-1.21923	5.77844	0.151389	1	Ns
PPP1R26	-1.21788	5.96399	0.151769	1	Ns
ZNF134	1.22324	4.422	0.151956	1	Ns
ELOVL6	1.22273	4.8069	0.152012	1	Ns
CCDC167	-1.2519	3.18577	0.152023	1	Ns
CSNK1G1	1.2136	6.13293	0.152048	1	Ns
SNX15	-1.22876	4.31271	0.152301	1	Ns
ZNF25	-1.31243	2.11458	0.153089	1	Ns
AC027796.3	1.29559	2.08855	0.153089	1	Ns
ACTA2	1.21717	4.70381	0.154302	1	Ns
DLK2	-1.33918	1.75007	0.154461	1	Ns
SESN3	1.23903	3.32996	0.154496	1	Ns
PTCH2	1.37376	0.922635	0.154501	1	Ns
LRP11	-1.20646	6.30896	0.154537	1	Ns
NPIPA9	-1.22442	4.05104	0.154545	1	Ns
ZNF680	1.26064	2.62634	0.155078	1	Ns
TRPM6	1.31974	1.57142	0.155087	1	Ns
DACT3	1.49507	0.643489	0.155269	1	Ns
CCDC7	-1.40292	0.691347	0.155269	1	Ns
ACYP1	-1.28322	1.91553	0.155741	1	Ns
LINC00488	1.54846	0.333577	0.156065	1	Ns
TAPT1-AS1	1.54846	0.333577	0.156065	1	Ns
ZBED2	1.54846	0.333577	0.156065	1	Ns
SLC22A4	1.29572	2.15572	0.156136	1	Ns
C17orf100	-1.3193	1.79012	0.156433	1	Ns
EIF2AK3-DT	-1.74938	-0.0693959	0.156442	1	Ns
AP001469.3	1.55991	-0.113107	0.156442	1	Ns
CAMK1	1.55991	-0.113107	0.156442	1	Ns
EPPK1	1.55991	-0.113107	0.156442	1	Ns
HRASLS	1.55991	-0.113107	0.156442	1	Ns
RNF144A-AS1	1.55991	-0.113107	0.156442	1	Ns
TNFRSF10C	1.55991	-0.113107	0.156442	1	Ns
UGT2B11	1.55991	-0.113107	0.156442	1	Ns
SDK1	1.25935	2.57814	0.156582	1	Ns
GREM2	-1.31323	2.07248	0.156754	1	Ns
SERPINE2	1.20126	5.84431	0.156884	1	Ns
RFLNB	-1.20114	5.98254	0.156999	1	Ns
NEFL	1.20442	5.38269	0.157163	1	Ns
GNAL	-1.20826	4.26293	0.157498	1	Ns
PRICKLE1	1.29578	2.18818	0.157576	1	Ns
NKILA	1.26821	2.40526	0.157632	1	Ns
ARID3B	1.21477	3.98096	0.157679	1	Ns
RAB4B-EGLN2	-1.44149	1.03627	0.157887	1	Ns
PCDHA2	1.36971	0.997451	0.157887	1	Ns
ZNF267	1.22717	3.63819	0.15795	1	Ns
SVIL	1.194	6.87903	0.158137	1	Ns
SLC29A1	-1.19775	5.6484	0.158409	1	Ns
ADAP1	-1.24125	2.80427	0.158617	1	Ns
RAPGEF1	-1.19285	6.81196	0.158641	1	Ns
GPR35	1.26879	2.43262	0.158829	1	Ns
ATP5MC2	-1.19227	6.66741	0.158957	1	Ns
NOTUM	-1.39365	0.799151	0.15932	1	Ns
CCL26	1.38342	0.760375	0.15932	1	Ns
L3MBTL4	1.38342	0.760375	0.15932	1	Ns
C9orf72	-1.23848	2.9683	0.159364	1	Ns
TP53I3	1.19058	6.64195	0.159483	1	Ns
SAPCD2	-1.19196	6.10609	0.15962	1	Ns
XK	1.2493	2.64163	0.159737	1	Ns
IFI6	1.23451	3.22422	0.159783	1	Ns
EHD1	1.18758	7.40941	0.160017	1	Ns
ITGAV	1.18579	8.66328	0.160221	1	Ns
CDC26	-1.21502	3.35895	0.160252	1	Ns
KPNA6	-1.1884	6.42924	0.160438	1	Ns
SNHG10	-1.27241	2.38882	0.160745	1	Ns
HOGA1	1.23169	2.7608	0.161035	1	Ns
GADD45B	-1.1975	4.81466	0.161042	1	Ns
GNAI1	-1.18905	5.74155	0.161135	1	Ns
VASH1-AS1	-1.30177	1.72412	0.161258	1	Ns
SLC25A22	-1.19301	4.84172	0.161326	1	Ns
PECR	-1.19947	4.62732	0.161386	1	Ns
NFIX	-1.19765	4.38445	0.161768	1	Ns
ANKRD29	1.20292	4.00797	0.162158	1	Ns
RAB8A	-1.18489	5.71287	0.162284	1	Ns
ITGA2	1.18404	5.93791	0.162357	1	Ns
ERAP2	1.29426	1.55419	0.162653	1	Ns
AXL	1.17752	8.41833	0.163137	1	Ns
RAPH1	-1.18624	5.00061	0.163227	1	Ns
PCDHA7	1.53022	0.0353298	0.163409	1	Ns
UGT2A3	1.53022	0.0353298	0.163409	1	Ns
ZNF391	1.53022	0.0353298	0.163409	1	Ns
TNNI3	-1.36778	1.16382	0.163871	1	Ns
NPR3	1.18847	4.61189	0.164002	1	Ns
CDKN3	-1.18703	4.54745	0.164183	1	Ns
NEXN	1.35232	1.37997	0.164368	1	Ns
TLR3	1.29376	1.39687	0.164368	1	Ns
FKBP9	-1.17457	7.41809	0.164563	1	Ns
DGAT2	1.19777	3.78916	0.164591	1	Ns
BMP1	1.17729	6.39233	0.1646	1	Ns
IFIT3	1.2944	1.60305	0.164672	1	Ns
ZNF75A	1.20829	3.61374	0.164956	1	Ns
NBL1	-1.1801	5.28533	0.165303	1	Ns
PCDHA1	1.45788	0.512609	0.165614	1	Ns
AC091271.1	-1.41393	0.574741	0.165614	1	Ns
AL353763.2	-1.41393	0.574741	0.165614	1	Ns
DHRS4-AS1	-1.19632	3.74202	0.165891	1	Ns
NFKB2	1.17098	7.1994	0.165898	1	Ns
OCLN	1.18001	4.75184	0.165901	1	Ns
FAM222B	1.17359	5.91018	0.166249	1	Ns
SLC7A7	-1.16916	7.66599	0.166348	1	Ns
TMEM169	-1.25607	2.15716	0.166452	1	Ns
FAM241A	1.1944	3.49723	0.166487	1	Ns
C12orf60	1.32672	1.17905	0.166526	1	Ns
PADI2	1.17812	5.10003	0.166852	1	Ns
CACNA1D	-1.19964	3.56714	0.166949	1	Ns
BSG	-1.16504	9.5879	0.167339	1	Ns
DCUN1D3	1.17589	4.45368	0.167365	1	Ns
UBE4B	-1.1707	5.58447	0.167582	1	Ns
2025-03-04	1.17332	5.20912	0.167723	1	Ns
ABCC8	1.20014	2.9161	0.167725	1	Ns
MAGED4	1.18633	3.6326	0.167841	1	Ns
TTC39A	1.21443	2.83028	0.167848	1	Ns
CDC42EP2	1.17256	4.84593	0.167956	1	Ns
TMPO-AS1	-1.20757	3.09568	0.168191	1	Ns
CYP1B1	1.16396	6.45688	0.168804	1	Ns
C11orf86	-1.18795	3.8112	0.168868	1	Ns
SMURF2	1.16948	5.43051	0.168935	1	Ns
HOXA10	1.20747	3.02802	0.169026	1	Ns
HMGN2P4	-1.52305	0.193129	0.169235	1	Ns
KIT	-1.52305	0.193129	0.169235	1	Ns
RPH3A	-1.52305	0.193129	0.169235	1	Ns
UNC5D	-1.52305	0.193129	0.169235	1	Ns
AC010542.4	1.5066	0.17006	0.169235	1	Ns
AC021242.3	1.5066	0.17006	0.169235	1	Ns
AC106886.2	1.5066	0.17006	0.169235	1	Ns
AP001273.1	-1.37894	0.993069	0.169325	1	Ns
GPR3	1.33135	0.971935	0.169325	1	Ns
WDFY3-AS2	-1.36243	0.663908	0.169568	1	Ns
LINC01116	1.23567	1.90363	0.169669	1	Ns
ZBTB45P2	-1.19865	3.27848	0.169748	1	Ns
AKIRIN1	1.16126	6.32762	0.170179	1	Ns
TMEM158	1.18119	3.64022	0.170239	1	Ns
ZNF678	1.21281	2.61667	0.171106	1	Ns
APH1B	1.16283	5.51566	0.171124	1	Ns
AC005833.1	1.23735	1.94216	0.171126	1	Ns
ATL1	1.18925	3.23798	0.171131	1	Ns
MTFP1	-1.16737	4.63946	0.171274	1	Ns
POLN	1.3243	1.30237	0.171282	1	Ns
CSAD	1.18649	3.09711	0.171681	1	Ns
LARGE2	1.27291	1.76865	0.171731	1	Ns
RHOU	1.15854	5.55118	0.1719	1	Ns
CDK18	-1.22732	2.42416	0.171957	1	Ns
PAPLN	1.32965	1.0443	0.172094	1	Ns
COASY	-1.15353	7.03589	0.172299	1	Ns
FUCA1	1.16718	4.42866	0.172451	1	Ns
NEDD9	-1.15296	7.10059	0.172461	1	Ns
TGFBR2	1.15039	8.6087	0.172758	1	Ns
CENPA	-1.16649	4.54056	0.173001	1	Ns
CLTCL1	1.17708	3.65944	0.173062	1	Ns
SLC43A2	1.16292	4.70893	0.173085	1	Ns
GPR37L1	1.33777	0.730378	0.173092	1	Ns
AC015813.5	-1.22948	2.17799	0.173109	1	Ns
KCNK3	-1.19797	2.79929	0.173178	1	Ns
LETM2	1.23201	1.82335	0.173279	1	Ns
ZNF274	1.15698	5.07332	0.173548	1	Ns
MMACHC	1.18122	3.2325	0.173741	1	Ns
AC023355.1	-1.4959	0.343588	0.174178	1	Ns
AC099489.1	-1.4959	0.343588	0.174178	1	Ns
APOD	1.48735	0.293399	0.174178	1	Ns
FAM83E	1.48735	0.293399	0.174178	1	Ns
CDH23	-1.28254	1.65493	0.174222	1	Ns
HBQ1	-1.28254	1.65493	0.174222	1	Ns
FOXM1	-1.14779	6.84195	0.174537	1	Ns
IGSF1	-1.33929	1.14424	0.174637	1	Ns
COL4A5	1.14764	6.34027	0.17529	1	Ns
OBSCN	1.14506	6.38157	0.175827	1	Ns
GLB1L2	-1.16134	3.74334	0.175897	1	Ns
S100A6	-1.14165	8.65383	0.175972	1	Ns
IRF9	1.1575	4.08557	0.17618	1	Ns
KPNA5	1.18995	2.77352	0.176788	1	Ns
MIR3936HG	-1.30885	1.20483	0.176981	1	Ns
NHEJ1	-1.17244	3.65996	0.177017	1	Ns
OCIAD2	1.14624	5.53394	0.177038	1	Ns
MMP7	1.14231	6.3715	0.177101	1	Ns
NR0B1	-1.14398	5.67811	0.177151	1	Ns
STRA6	1.14162	6.08312	0.177533	1	Ns
NR2F6	-1.13814	6.76957	0.178159	1	Ns
KMT2E-AS1	-1.42726	0.447763	0.178424	1	Ns
LNP1	-1.42726	0.447763	0.178424	1	Ns
NKX6-1	1.41274	0.368927	0.178424	1	Ns
L3MBTL1	1.21961	1.96666	0.178778	1	Ns
TREX1	-1.24697	1.79215	0.17891	1	Ns
SFI1	-1.1523	4.251	0.178954	1	Ns
PMF1-BGLAP	-1.28218	1.53581	0.179045	1	Ns
TMEM132D-AS1	1.29156	0.868441	0.179103	1	Ns
AC131206.1	1.29312	1.22043	0.179148	1	Ns
FGF11	-1.28122	1.26299	0.179148	1	Ns
PRADC1	-1.2056	2.62042	0.179181	1	Ns
ZNF518B	1.14517	4.30762	0.179654	1	Ns
ROR2	1.19873	2.18483	0.179742	1	Ns
TMEM117	1.19873	2.18483	0.179742	1	Ns
ZNF26	1.16122	3.67029	0.179802	1	Ns
TUBA4A	1.13137	7.6791	0.180085	1	Ns
CHCHD6	-1.1547	3.81247	0.180305	1	Ns
NCR3LG1	1.15249	3.74801	0.180423	1	Ns
AK4P1	-1.28237	1.5966	0.180696	1	Ns
ASF1B	-1.13683	5.14678	0.180742	1	Ns
PIF1	-1.1643	3.43755	0.180746	1	Ns
CDC45	-1.14373	4.72791	0.180781	1	Ns
ENO1P1	-1.67946	-0.116774	0.181042	1	Ns
SCHIP1	-1.67946	-0.116774	0.181042	1	Ns
AL390195.2	1.47304	-0.167629	0.181042	1	Ns
AL513327.1	1.47304	-0.167629	0.181042	1	Ns
AMY2B	1.47304	-0.167629	0.181042	1	Ns
SKOR1	1.47304	-0.167629	0.181042	1	Ns
C2CD2	1.14083	4.70423	0.181219	1	Ns
CDH17	1.13413	5.49295	0.18157	1	Ns
CKMT1B	1.29194	0.945977	0.181687	1	Ns
ST6GAL1	1.13789	4.36978	0.181777	1	Ns
BLVRB	-1.12603	8.50018	0.181855	1	Ns
HIPK2	1.1265	7.69866	0.181917	1	Ns
METTL4	-1.19541	2.61343	0.183376	1	Ns
CFD	-1.13308	5.0619	0.183584	1	Ns
AC073857.1	-1.31178	1.03914	0.18404	1	Ns
TRIM22	1.29228	1.01959	0.18404	1	Ns
P4HA1	-1.12898	4.95584	0.184422	1	Ns
ZNF254	1.14819	3.53782	0.184455	1	Ns
DPM3	-1.16154	3.12337	0.184562	1	Ns
OTULINL	1.1937	2.32709	0.18459	1	Ns
MEAK7	1.12326	5.64204	0.184663	1	Ns
NT5M	-1.14657	3.77053	0.184936	1	Ns
HECTD2	1.16222	3.01427	0.185028	1	Ns
SMPD3	-1.32078	0.635917	0.185341	1	Ns
DEPDC1B	-1.13682	4.09185	0.185834	1	Ns
ACVR2B	1.12134	5.36846	0.185867	1	Ns
FSTL4	1.12562	4.88392	0.186004	1	Ns
NYAP1	-1.19202	2.39994	0.186297	1	Ns
CNFN	-1.21004	1.76696	0.186422	1	Ns
AC100803.2	-1.55831	0.0249144	0.1865	1	Ns
AL162586.1	-1.55831	0.0249144	0.1865	1	Ns
RPS20P22	-1.55831	0.0249144	0.1865	1	Ns
AL691482.3	1.45269	-0.0139186	0.1865	1	Ns
ATP2C2-AS1	1.45269	-0.0139186	0.1865	1	Ns
CADPS2	1.45269	-0.0139186	0.1865	1	Ns
COLQ	1.45269	-0.0139186	0.1865	1	Ns
DAW1	1.45269	-0.0139186	0.1865	1	Ns
TC2N	-1.1453	3.75733	0.186558	1	Ns
LMO7	1.11592	6.68747	0.186583	1	Ns
MYH14	-1.12602	4.7836	0.186682	1	Ns
ABCG2	-1.11759	6.15792	0.186709	1	Ns
XRRA1	-1.14561	3.29424	0.186924	1	Ns
AK7	-1.182	2.2569	0.187263	1	Ns
CCNJL	1.11648	5.39735	0.187431	1	Ns
DAPK3	1.11594	5.80008	0.187441	1	Ns
SLC7A5	-1.11054	10.7716	0.187499	1	Ns
PMAIP1	1.12843	3.97424	0.187537	1	Ns
ARPC4-TTLL3	1.23001	1.78149	0.187668	1	Ns
VTN	-1.12425	4.3503	0.187736	1	Ns
NEAT1	-1.11059	8.30099	0.187833	1	Ns
PCDHB2	1.1272	3.80024	0.188102	1	Ns
C21orf59-TCP10L	1.29287	1.15652	0.188166	1	Ns
AC008079.1	1.38924	0.671921	0.188194	1	Ns
ZNF420	1.38924	0.671921	0.188194	1	Ns
KBTBD8	1.29064	0.699771	0.188194	1	Ns
SLC9B2	1.14374	3.23616	0.188368	1	Ns
ZBTB10	-1.13626	3.94762	0.18844	1	Ns
ZNF416	1.1584	2.77232	0.188734	1	Ns
CENPH	-1.12481	4.24972	0.189063	1	Ns
TRIM36	1.21794	1.55187	0.189349	1	Ns
RNLS	1.1665	2.49075	0.189382	1	Ns
EOGT	1.12761	3.464	0.189563	1	Ns
CXCL2	1.12675	3.92062	0.189654	1	Ns
DHPS	-1.1125	5.58968	0.189876	1	Ns
SMAD2	-1.10702	6.87969	0.189949	1	Ns
A1CF	1.26004	1.19853	0.189985	1	Ns
FAM106A	1.15543	2.50753	0.190092	1	Ns
UBA3	-1.11707	4.43212	0.190093	1	Ns
DHRS11	-1.13122	3.43045	0.190926	1	Ns
AC006486.2	-1.46449	0.153892	0.190953	1	Ns
BHLHE41	1.43659	0.12515	0.190953	1	Ns
FAM221A	1.43659	0.12515	0.190953	1	Ns
FAM47E	-1.15305	2.86405	0.191012	1	Ns
AP003486.1	-1.17071	1.9307	0.191044	1	Ns
EXOC3L4	-1.17071	1.9307	0.191044	1	Ns
ENO1	-1.0999	11.8173	0.191624	1	Ns
HMGCR	1.10412	6.19317	0.191676	1	Ns
ZSWIM4	1.11509	4.29399	0.191902	1	Ns
NKIRAS1	1.1292	3.36381	0.192011	1	Ns
PYURF	-1.10874	5.15554	0.19205	1	Ns
ZDHHC13	-1.11923	4.30566	0.192097	1	Ns
RACGAP1	-1.10289	6.06945	0.192308	1	Ns
VAV3	-1.11614	4.51329	0.192392	1	Ns
LYST	1.11812	3.8878	0.192469	1	Ns
KCNN4	1.10375	5.67387	0.192869	1	Ns
PLEKHA3	-1.12103	4.04142	0.192872	1	Ns
AC004466.1	-1.35111	0.875751	0.193007	1	Ns
ADIRF-AS1	-1.20647	1.99889	0.193035	1	Ns
MOSPD1	1.12129	3.83445	0.193037	1	Ns
ADGRL3	-1.11715	4.23575	0.193148	1	Ns
YOD1	1.10677	4.9027	0.193148	1	Ns
KIF20A	-1.10108	5.71891	0.19343	1	Ns
TP53	-1.09845	6.6863	0.193492	1	Ns
FAM20C	-1.10142	5.82124	0.193521	1	Ns
VAMP1	-1.11887	3.78799	0.193649	1	Ns
HIST1H2AC	1.11527	4.2665	0.194124	1	Ns
TRPS1	1.20485	1.72301	0.194283	1	Ns
ZNF799	1.20485	1.72301	0.194283	1	Ns
BX537318.1	-1.4437	0.308379	0.194652	1	Ns
HRK	-1.4437	0.308379	0.194652	1	Ns
TMEM229B	1.42354	0.252121	0.194652	1	Ns
MST1L	-1.38953	0.272255	0.194652	1	Ns
FIGNL2	1.2084	1.39438	0.194671	1	Ns
H2AFV	-1.09463	6.74896	0.194955	1	Ns
AC015712.6	1.25142	0.919564	0.195055	1	Ns
LYSMD1	-1.14738	2.71448	0.195058	1	Ns
ARL4C	1.09167	8.92686	0.195127	1	Ns
MICAL1	1.10534	4.38007	0.19563	1	Ns
CFH	1.09552	5.86811	0.195807	1	Ns
BBC3	1.0975	5.32925	0.195902	1	Ns
ATP6V0E2-AS1	1.21182	1.4488	0.196021	1	Ns
ZNF814	1.1473	2.54932	0.196039	1	Ns
S100P	-1.10833	4.23849	0.196263	1	Ns
AOC3	1.16986	1.82133	0.196365	1	Ns
YJU2	-1.10994	3.81739	0.196401	1	Ns
MUC3A	1.14404	2.11732	0.196515	1	Ns
RTKN2	1.14404	2.11732	0.196515	1	Ns
GPRC5A	1.08803	8.86484	0.196598	1	Ns
EPB41L4B	1.09876	4.96276	0.196603	1	Ns
MAPK14	-1.09596	5.44589	0.196668	1	Ns
AC006449.6	-1.28017	1.01773	0.196909	1	Ns
PAFAH1B2	-1.09188	6.08857	0.197085	1	Ns
CCDC144B	1.15625	2.38273	0.197245	1	Ns
QRICH2	1.17348	1.86206	0.197327	1	Ns
TGFA	1.17348	1.86206	0.197327	1	Ns
LINC01534	-1.37858	0.415084	0.197774	1	Ns
ETNK2	1.12246	3.11714	0.197847	1	Ns
PLCXD3	-1.15386	1.91933	0.198241	1	Ns
STAG3	-1.10272	3.97782	0.198406	1	Ns
SDHA	-1.08478	7.40816	0.198445	1	Ns
BOLA2B	-1.11408	3.63342	0.198615	1	Ns
L1CAM	-1.10805	3.46027	0.199512	1	Ns
HGSNAT	1.08283	6.89329	0.199523	1	Ns
SP110	1.10893	3.1982	0.19967	1	Ns
STK40	1.08864	4.98548	0.199901	1	Ns
PDK1	-1.12286	3.07752	0.19996	1	Ns
CD9	-1.08253	6.16381	0.200082	1	Ns
ARID5A	1.13124	2.51515	0.200214	1	Ns
ETS2	1.08227	6.07827	0.200297	1	Ns
CTAGE7P	-1.32412	0.514424	0.200443	1	Ns
DPY19L1P1	-1.32412	0.514424	0.200443	1	Ns
MST1P2	-1.32412	0.514424	0.200443	1	Ns
LRIF1	1.08847	4.69445	0.200516	1	Ns
DBN1	1.07908	7.59922	0.200622	1	Ns
TPRG1L	1.08506	5.38552	0.200768	1	Ns
TBC1D14	-1.07882	7.32033	0.200921	1	Ns
KAZALD1	-1.11165	3.40164	0.200957	1	Ns
LINC02035	-1.10819	3.12531	0.201054	1	Ns
DAGLA	1.09526	4.25296	0.201377	1	Ns
LINC00910	-1.18744	1.69982	0.201587	1	Ns
RIT1	1.08629	4.64088	0.201652	1	Ns
CDIP1	1.09063	3.86014	0.201677	1	Ns
TNFRSF19	-1.14632	2.60771	0.201777	1	Ns
GREB1L	1.1734	2.0729	0.202207	1	Ns
SYT7	-1.15467	2.08791	0.202207	1	Ns
MAP1B	1.07368	9.39035	0.202348	1	Ns
AKR1B10	-1.07278	11.231	0.20258	1	Ns
TSGA10	1.34367	0.543771	0.20275	1	Ns
DMC1	-1.27789	0.60735	0.20275	1	Ns
UBE2T	-1.0842	4.95186	0.202839	1	Ns
GFPT2	1.07643	6.03869	0.202978	1	Ns
KCTD21	1.09508	3.92568	0.203067	1	Ns
AC132872.4	1.18501	1.75149	0.203384	1	Ns
AL161431.1	-1.1479	2.16051	0.203559	1	Ns
KDM1B	-1.08685	4.5006	0.203599	1	Ns
SOCS3	1.07585	5.46528	0.203819	1	Ns
UNG	-1.07462	6.00054	0.203993	1	Ns
LINC00304	1.23231	1.29977	0.20405	1	Ns
PRODH	1.23231	1.29977	0.20405	1	Ns
SLC52A3	1.13389	2.17183	0.204193	1	Ns
SNAPC1	-1.09635	3.56723	0.204373	1	Ns
AC138907.9	1.24192	0.668529	0.204764	1	Ns
CMSS1	-1.23811	0.694642	0.204764	1	Ns
PFKFB2	-1.09528	3.91974	0.204764	1	Ns
AC008522.1	-1.18755	1.40832	0.205163	1	Ns
AGPAT4	1.11573	2.76355	0.205321	1	Ns
BOLA1	-1.10531	3.34978	0.205623	1	Ns
AC020763.4	1.49958	-0.339423	0.205715	1	Ns
AC022784.1	1.49958	-0.339423	0.205715	1	Ns
GPR162	1.49958	-0.339423	0.205715	1	Ns
ZDHHC22	1.49958	-0.339423	0.205715	1	Ns
LIFR	1.07994	4.34355	0.206147	1	Ns
AC004997.1	1.18331	1.43006	0.206196	1	Ns
GCOM1	1.24549	0.757097	0.206537	1	Ns
NIPAL1	1.24549	0.757097	0.206537	1	Ns
RGMA	1.24549	0.757097	0.206537	1	Ns
COL5A2	1.06366	7.98482	0.206834	1	Ns
TDRD3	-1.10299	3.08357	0.207051	1	Ns
F7	1.14374	1.95162	0.207116	1	Ns
ISG15	1.14374	1.95162	0.207116	1	Ns
BOLA2	-1.0919	3.70857	0.207153	1	Ns
RANBP10	-1.07274	4.75938	0.207311	1	Ns
MUC12	1.24863	0.840593	0.208109	1	Ns
NBPF25P	1.24863	0.840593	0.208109	1	Ns
PRKAR1B	1.06329	6.30118	0.208365	1	Ns
FBXL12	1.08161	4.01788	0.20858	1	Ns
SNHG14	1.06166	6.4867	0.208683	1	Ns
IGSF11	-1.09711	3.19135	0.209009	1	Ns
KCTD9	-1.06544	5.55087	0.209292	1	Ns
MTMR9	1.06631	5.29486	0.209294	1	Ns
MCL1	1.05767	8.01298	0.209336	1	Ns
COL4A1	1.05697	8.55055	0.20947	1	Ns
ATXN1	1.06795	4.75051	0.209472	1	Ns
ANAPC15	-1.06819	4.45892	0.209513	1	Ns
SLC4A5	1.20974	0.892678	0.209514	1	Ns
ZNF136	1.20974	0.892678	0.209514	1	Ns
NMNAT3	-1.18335	1.64329	0.209686	1	Ns
AC090517.4	-1.60598	-0.165824	0.210007	1	Ns
DOK7	-1.60598	-0.165824	0.210007	1	Ns
GSC	1.3806	-0.224194	0.210007	1	Ns
CEACAM6	1.05586	8.1156	0.210066	1	Ns
CHL1	-1.10743	2.52533	0.210163	1	Ns
PAXIP1-AS1	-1.10743	2.52533	0.210163	1	Ns
CCDC68	-1.08556	3.28726	0.210476	1	Ns
TNRC6A	1.05408	7.25117	0.211218	1	Ns
PRDM1	1.1139	2.57275	0.211302	1	Ns
TUBD1	1.07359	3.67424	0.211306	1	Ns
SYBU	-1.06687	4.50141	0.211535	1	Ns
C16orf74	-1.09897	3.15631	0.211761	1	Ns
HJURP	-1.05323	6.94816	0.211845	1	Ns
AC105052.1	-1.25028	1.0838	0.211915	1	Ns
CYB5R1	1.06563	4.76832	0.211971	1	Ns
C6orf141	1.09795	2.62813	0.212003	1	Ns
MFGE8	1.05417	6.15935	0.212106	1	Ns
STK38	-1.05978	5.22907	0.212153	1	Ns
CWC25	-1.06321	4.37249	0.212428	1	Ns
AC009041.2	-1.22336	1.14698	0.212949	1	Ns
TMEM184B	-1.0523	6.38294	0.212978	1	Ns
SORL1	1.05427	5.39915	0.213118	1	Ns
TMCC1-AS1	-1.11874	2.35022	0.213216	1	Ns
AC112907.3	-1.49163	-0.0193829	0.213257	1	Ns
SIRT4	-1.49163	-0.0193829	0.213257	1	Ns
TFAP2A-AS1	-1.49163	-0.0193829	0.213257	1	Ns
DUSP15	1.37075	-0.0648278	0.213257	1	Ns
IKZF2	1.37075	-0.0648278	0.213257	1	Ns
NUDT6	-1.09596	2.72992	0.213284	1	Ns
TMOD2	1.08313	3.01114	0.213307	1	Ns
SLC6A9	-1.06581	3.97354	0.213429	1	Ns
PSIP1	-1.04993	6.66766	0.2135	1	Ns
ITGAL	1.22618	1.1763	0.213892	1	Ns
PARD6A	-1.19898	1.2075	0.213892	1	Ns
TRIM52-AS1	-1.19898	1.2075	0.213892	1	Ns
THSD7A	-1.05949	4.67064	0.213983	1	Ns
GID4	1.05428	5.19721	0.214186	1	Ns
AMZ2P1	-1.07891	3.10557	0.214464	1	Ns
NR2F1	-1.06638	3.56075	0.214492	1	Ns
CASC15	1.1963	1.21773	0.214755	1	Ns
ZNF200	1.06559	3.75875	0.214773	1	Ns
EME1	-1.05829	4.44489	0.214843	1	Ns
SZRD1	-1.0463	6.5992	0.215126	1	Ns
DPYSL4	1.0605	4.34985	0.215141	1	Ns
STAG3L5P-PVRIG2P-PILRB	-1.06859	3.81259	0.21543	1	Ns
DUSP19	-1.15652	1.32143	0.215548	1	Ns
FZD3	1.05189	4.71515	0.21578	1	Ns
AC010329.1	-1.40344	0.113515	0.215791	1	Ns
AP003469.4	-1.40344	0.113515	0.215791	1	Ns
AC245033.1	1.36302	0.0788627	0.215791	1	Ns
IGFN1	1.36302	0.0788627	0.215791	1	Ns
MUC20P1	1.36302	0.0788627	0.215791	1	Ns
SPEF1	1.36302	0.0788627	0.215791	1	Ns
TMEM253	1.36302	0.0788627	0.215791	1	Ns
CACYBP	-1.04471	6.52721	0.215885	1	Ns
CASZ1	-1.11123	2.5562	0.215955	1	Ns
JAG1	1.04222	7.67545	0.21607	1	Ns
KCNH3	1.07222	3.47486	0.216166	1	Ns
AC087289.3	-1.16295	1.39185	0.216279	1	Ns
TTLL1	-1.16295	1.39185	0.216279	1	Ns
TARID	1.14842	1.35524	0.216279	1	Ns
HLF	1.08083	3.26423	0.216609	1	Ns
PLEKHA4	1.09453	2.11559	0.216752	1	Ns
ZNF138	1.09453	2.11559	0.216752	1	Ns
AC118282.4	1.10734	2.61271	0.216806	1	Ns
TBX2	1.0592	3.54663	0.217045	1	Ns
DNM1P47	1.09917	2.14891	0.21713	1	Ns
PLEKHH1	1.05991	3.962	0.217263	1	Ns
LGSN	-1.0491	4.68868	0.217783	1	Ns
SIRPAP1	1.35678	0.209682	0.217815	1	Ns
MROH8	-1.33325	0.235165	0.217815	1	Ns
ICA1	1.08654	2.70409	0.217825	1	Ns
PRR36	1.10784	2.21334	0.21784	1	Ns
RHBDF2	1.03873	7.11297	0.217901	1	Ns
GAN	1.0424	5.66345	0.218382	1	Ns
SYT6	1.14284	1.54956	0.218708	1	Ns
STC2	1.03697	7.00004	0.218743	1	Ns
RTL8B	1.08505	2.36138	0.219381	1	Ns
LMBR1L	1.04791	4.47013	0.219414	1	Ns
AC004918.3	-1.32819	0.381618	0.219463	1	Ns
HMGN2P17	-1.32819	0.381618	0.219463	1	Ns
TM4SF5	-1.32819	0.381618	0.219463	1	Ns
GVQW3	-1.14744	1.67291	0.219692	1	Ns
CNTNAP3C	-1.05701	3.81626	0.219843	1	Ns
NXT2	-1.06864	3.57588	0.219865	1	Ns
KIAA0513	1.05666	3.56711	0.219865	1	Ns
RRN3P1	1.15764	1.69179	0.220139	1	Ns
DDX59	-1.04786	4.06064	0.220155	1	Ns
NEIL3	-1.04848	4.416	0.220249	1	Ns
MRPS34	-1.03383	6.84955	0.220297	1	Ns
GPALPP1	-1.05689	3.91529	0.220757	1	Ns
HEATR5A	-1.03472	6.12245	0.220806	1	Ns
PMS2P7	-1.27703	0.483254	0.220829	1	Ns
CKB	1.03759	5.4514	0.220876	1	Ns
TMEM241	-1.10035	2.54888	0.221107	1	Ns
HPGD	1.0305	7.65292	0.221184	1	Ns
ERCC6	1.04503	4.1696	0.221201	1	Ns
CLDND1	-1.04001	4.82425	0.221437	1	Ns
GTF2IRD1	-1.03714	5.36429	0.221563	1	Ns
AC132192.2	-1.10211	1.88465	0.221681	1	Ns
MRPS23	-1.03126	6.32593	0.221754	1	Ns
AC019069.1	1.28945	0.509009	0.221976	1	Ns
FBXL21	1.28945	0.509009	0.221976	1	Ns
AC097374.1	-1.23368	0.578184	0.221976	1	Ns
TMEM110-MUSTN1	-1.23368	0.578184	0.221976	1	Ns
SGK3	1.07458	2.69617	0.222473	1	Ns
ARSD	1.03066	5.66577	0.222689	1	Ns
DNAJC12	1.04517	4.14789	0.22279	1	Ns
GTF2IP4	-1.027	7.5354	0.222825	1	Ns
MAP4K3-DT	1.29009	0.607506	0.222952	1	Ns
AP005212.4	1.19149	0.636626	0.222952	1	Ns
PROB1	-1.08229	2.81619	0.223286	1	Ns
RAB37	-1.07319	2.8101	0.223286	1	Ns
AC079949.2	1.12199	2.07112	0.22345	1	Ns
ANKRD24	1.08967	2.08148	0.22345	1	Ns
ZNF548	1.07641	2.10372	0.223698	1	Ns
AP3B2	1.19835	0.727063	0.223792	1	Ns
CDPF1	-1.06158	2.89184	0.223859	1	Ns
SLC23A2	-1.02356	7.98006	0.224143	1	Ns
PARD6B	1.03411	4.73269	0.224175	1	Ns
KLF13	-1.02373	7.66289	0.224205	1	Ns
KCND1	1.09099	2.20224	0.224376	1	Ns
HDX	1.20439	0.81222	0.224521	1	Ns
GAS6	-1.04617	3.9187	0.224926	1	Ns
TGFB1	1.02154	7.93199	0.225027	1	Ns
ZNF30	1.05632	3.05741	0.22506	1	Ns
CLDN1	1.02253	7.0312	0.225081	1	Ns
ANP32E	-1.02373	6.41836	0.225091	1	Ns
RALB	1.02457	5.97138	0.225358	1	Ns
CD82	1.07421	2.37972	0.2255	1	Ns
AR	-1.02378	6.17322	0.225614	1	Ns
ZYX	1.0206	7.18083	0.225835	1	Ns
CITED4	1.02609	5.31388	0.225865	1	Ns
ZBTB41	-1.04588	3.79734	0.226396	1	Ns
PIM2	1.04224	3.80011	0.22645	1	Ns
FAM214B	1.02805	4.48015	0.226498	1	Ns
MICB	1.03493	4.19848	0.226582	1	Ns
CRB3	1.07819	2.5714	0.226652	1	Ns
TMEM170A	1.02748	4.76661	0.226712	1	Ns
HLA-DMA	1.05986	2.60295	0.226775	1	Ns
CYP26B1	-1.02476	5.39411	0.227053	1	Ns
LHX1-DT	1.19151	1.15374	0.227069	1	Ns
AC239868.2	-1.17048	1.18851	0.227069	1	Ns
RARRES1	-1.04598	3.46263	0.227242	1	Ns
F2R	1.01836	6.559	0.227352	1	Ns
MCF2L	1.06961	2.7329	0.227435	1	Ns
RASGRP1	1.16834	1.258	0.227759	1	Ns
AC015871.3	1.10977	1.2764	0.227759	1	Ns
NPTXR	1.02457	4.99176	0.227781	1	Ns
TNFAIP8	1.02632	4.87948	0.228345	1	Ns
COL4A6	1.01634	6.22583	0.228465	1	Ns
MT2A	1.01984	5.21272	0.228685	1	Ns
TGFBR3	1.01655	5.98637	0.228946	1	Ns
ADI1	1.01491	6.31606	0.229211	1	Ns
SEC16B	1.12216	1.58163	0.229224	1	Ns
KIF13A	-1.01332	6.89781	0.229371	1	Ns
SDHAF4	-1.12701	1.65926	0.229407	1	Ns
MMP17	-1.03936	3.25629	0.22947	1	Ns
STK36	1.02416	4.57245	0.22964	1	Ns
CKMT2-AS1	-1.10056	1.74339	0.229737	1	Ns
MOCS1	1.07982	1.7624	0.229886	1	Ns
FAM120C	-1.02826	4.17578	0.229947	1	Ns
ANKRD30A	-1.09556	1.83506	0.230025	1	Ns
AC008124.1	-1.07475	2.11149	0.230887	1	Ns
C1orf61	1.0636	2.12563	0.230971	1	Ns
HELZ2	1.01457	5.13467	0.231103	1	Ns
EPHX2	-1.02485	4.04524	0.231475	1	Ns
MEST	1.00859	6.66114	0.231658	1	Ns
LEPR	-1.05734	2.46293	0.231676	1	Ns
CACNG6	1.06227	2.46949	0.231725	1	Ns
SUSD6	1.01367	4.96825	0.231747	1	Ns
HSPG2	1.00569	9.5109	0.231788	1	Ns
CERS1	1.05784	2.72513	0.232164	1	Ns
SYDE1	1.0199	4.58038	0.232333	1	Ns
WFS1	1.00817	6.03628	0.232536	1	Ns
PPP1R18	1.00978	5.63394	0.232651	1	Ns
STEAP2	1.00696	6.30593	0.232819	1	Ns
IL10RB-DT	1.02967	3.41069	0.232976	1	Ns
HOOK1	1.02856	3.66471	0.233184	1	Ns
FOXO1	1.03275	3.71739	0.233223	1	Ns
SC5D	1.02249	4.06535	0.233441	1	Ns
CNN2	1.00357	6.95427	0.233693	1	Ns
SFXN3	1.00509	5.47625	0.234644	1	Ns
PDLIM7	1.00975	5.06816	0.234788	1	Ns
BRK1	-1.00357	5.80938	0.235131	1	Ns
SLC9A8	-1.0053	5.51738	0.23534	1	Ns
ARRDC1-AS1	-1.01408	3.86523	0.235535	1	Ns
THSD4	-0.998604	7.28956	0.235783	1	Ns
CAPG	-1.02536	3.60008	0.235792	1	Ns
VPS52	-1.00988	4.84293	0.236017	1	Ns
BZW1P2	1.0208	3.25163	0.236192	1	Ns
GALNT5	1.02883	3.21593	0.236231	1	Ns
IGFBP6	0.99743	7.31081	0.236264	1	Ns
CHST11	1.00175	5.60003	0.236612	1	Ns
KRT10	-1.00285	5.09799	0.236673	1	Ns
FRMD6	1.00852	4.35939	0.236729	1	Ns
DHCR7	0.996887	6.79611	0.236895	1	Ns
SQLE	0.997404	6.3962	0.237131	1	Ns
PCDHGA7	1.05174	2.554	0.237291	1	Ns
CDH2	1.05685	2.51236	0.237386	1	Ns
LXN	-1.01306	4.01809	0.23741	1	Ns
TNS2	-0.997832	6.03725	0.23747	1	Ns
FAM110C	1.04387	2.35986	0.237707	1	Ns
STX12	1.00635	4.49429	0.237945	1	Ns
RHBDF1	1.0031	4.93649	0.238022	1	Ns
TLL1	1.05121	2.1472	0.238174	1	Ns
UFSP1	-1.0661	2.1428	0.23825	1	Ns
CASTOR1	1.0051	4.37566	0.23826	1	Ns
RN7SL2	-0.993052	7.20473	0.238408	1	Ns
ADH6	-1.06842	2.06924	0.238413	1	Ns
ADGRL1	-0.997625	5.65857	0.238455	1	Ns
RASA4	1.01952	3.58585	0.238486	1	Ns
[truncated: 12,576 more rows]
