# Supplementary material for: RMI2 Depletion Recovers cGAS-STING Signaling to Enhance Immunotherapy in Colorectal Cancer
Source: Research Square preprint supplement (doi:10.21203/rs.3.rs-8706982/v1), 2026-02-19
Supplement: Supplementary file 3 [file 3c0a67eefdfd515a99744d77.docx]

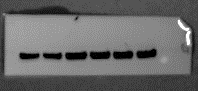

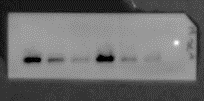

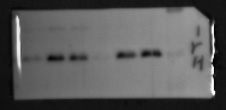
Figure 4A

GAPDH

RMI2

γH2AX


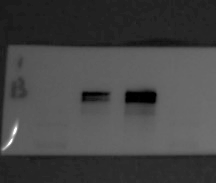

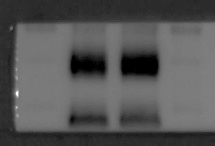

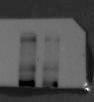

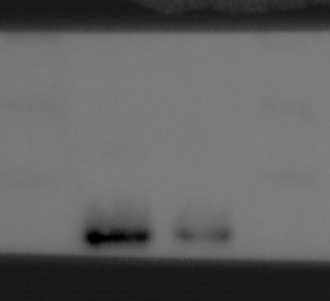

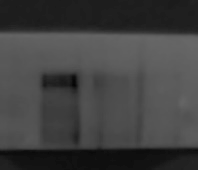

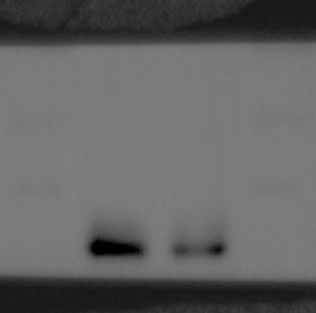

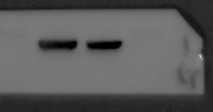

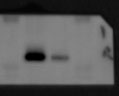
Figure 4L

IP:

RAD51

IP:

BRCA1

WCL

RAD51

BRCA1

RAD51

BRCA1

RAD51

BRCA1

GAPDH

RMI2


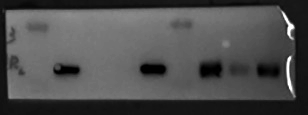
Figure 5E Figure 5F

RMI2


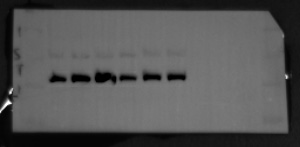

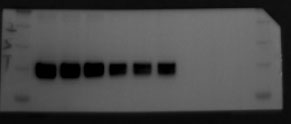


P-STING


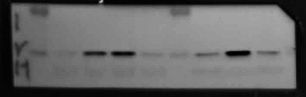

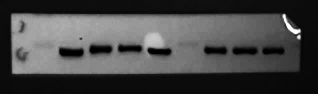

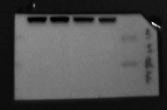

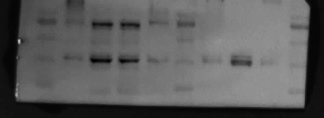

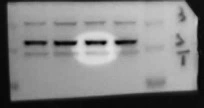

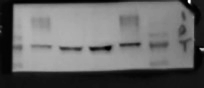

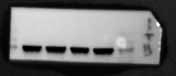

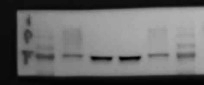


GAPDH

IRF3

P-IRF3

STING

P-STING

TBK1

p-TBK1

γH2AX


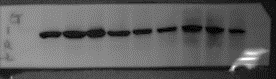

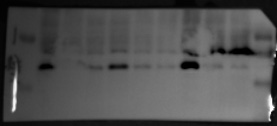


GAPDH

STING

RMI2


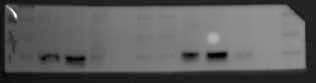
 Figure 5L

STING


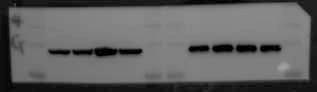

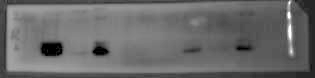


GAPDH

RMI2
